# Supplementary material for: Lentiviral vector mediated gene therapy for type I Dent disease ameliorates Dent disease-like phenotypes for three months in ClC-5 null mice
Source: PubMed Central journal article supplement (PMC9574595; doi:10.1016/j.omtm.2022.09.009), 2022-09-24
Supplement: mmc1.pdf [file mmc1.pdf]

**OMTM, Volume 27**

**Supplemental information**

**Lentiviral vector mediated gene therapy for type I**

**Dent disease ameliorates Dent disease-like**

**phenotypes for three months in CIC-5 null mice**

**Manish Kumar Yadav, Kyung Whan Yoo, Anthony Atala, and Baisong Lu**

**Table S1. Predicted off-targets for sgRNA 1**

| Coordinates              | strand | MM | target_seq            | PAM | distance | Intromonon exon | gene name | gene id            | Off-target name |
|--------------------------|--------|----|-----------------------|-----|----------|-----------------|-----------|--------------------|-----------------|
| chrX:7185297-7185319     | -      | 0  | TCTGGGTTGATCATCTAAAC  | TGG | 865      | I               | Clcn5     | ENSMUSG00000004317 |                 |
| chr6:54711115-54711137   | +      | 3  | TTAGGTAAGATCATCTAAAC  | TGG | 7264     | I               | Mturn     | ENSMUSG00000038065 | Off-1-1         |
| chr17:85954799-85954821  | +      | 4  | ACAGGGCTGAACATCTAAAC  | TGG | 29844    | -               | Srbdl     | ENSMUSG00000024135 |                 |
| chr17:85350804-85350826  | +      | 3  | TCTGGGGTTGTCATCTAAAC  | AGG | 40747    | I               | Camkmt    | ENSMUSG00000071037 | Off-1-2         |
| chr5:65536652-65536674   | +      | 4  | TCAGCATTGATTATCTAAAC  | AGG | 115      | I               | Smim14    | ENSMUSG00000037822 |                 |
| chr1:105511230-105511252 | -      | 4  | TCTTGGTGATTCATCTAAAC  | TGG | 7170     | I               | Pign      | ENSMUSG00000056536 |                 |
| chr1:5468047-5468069     | -      | 4  | TCTAGTTGGATCACCTAAAC  | TGG | 62469    | -               | Gm38264   | ENSMUSG00000102907 |                 |
| chr16:3714939-3714961    | +      | 4  | GCTGTGTTGTTTCACCTAAAC | TGG | 232      | I               | Mefv      | ENSMUSG00000022534 |                 |
| chrX:39778533-39778555   | -      | 4  | ACTGGGTTTCTCTTCTAAAC  | AGG | 18029    | I               | Gm14571   | ENSMUSG00000083845 | Off-1-4         |
| chr3:43053460-43053482   | -      | 3  | TTTGGGTTGATGATAATAAAC | AGG | NA       | I               | NA        | NA                 | Off-1-3         |
| chr3:154172243-154172265 | +      | 4  | TGTGGGTGGAACAGCTAAAC  | AGG | 626      | I               | Slc44a5   | ENSMUSG00000028360 |                 |
| chr7:99620983-99621005   | -      | 4  | CCTGAGTTGACCATTTAAAC  | TGG | 3077     | -               | Gm4980    | ENSMUSG00000096606 |                 |
| chr6:82418407-82418429   | +      | 4  | TCTGGAGTCATCATTTAAAC  | TGG | 13043    | I               | Tacr1     | ENSMUSG00000030043 |                 |
| chr13:82483478-82483500  | -      | 4  | ACTGGCTTTATCATCAAAAAC | AGG | NA       | -               | NA        | NA                 |                 |
| chrX:60831139-60831161   | +      | 4  | CCTGGGTGCATCATCCAAAC  | AGG | 12357    | I               | Gm14660   | ENSMUSG00000081891 | Off-1-5         |

The first row is the on-target information. Efficacy score by CRISPRater: 0.74 MEDIUM. The nucleotides in red indicate those mismatching with the sgRNA. The highlighted off-targets were sequenced in a male mutant. MM: number of mismatched nucleotides. The coordinates of off-targets were based on the GRCm38/mm10 assembly (2011).

**Table S2. Predicted off-targets for sgRNA 2**

| Coordinates              | strand | M | target_seq               | PA      | distance | Intron or exon | gene-name | gene-id            | Off-target name |
|--------------------------|--------|---|--------------------------|---------|----------|----------------|-----------|--------------------|-----------------|
| chrX:7171872-7171894     | +      | 0 | AGGGGGCCGAATTCTTGCA<br>A | GG<br>G | 606      | I              | Cln5      | ENSMUSG00000004317 |                 |
| chr6:118613497-118613519 | -      | 4 | AGGAACCCAATTCTTGCA<br>A  | TGG     | 127      | I              | Cacna1c   | ENSMUSG00000051331 | off-2-3         |
| chr18:39908859-39908881  | +      | 4 | CAGGGGCAGAAGTCTTGCA<br>A | TGGNA   |          | -              | NA        | NA                 |                 |
| chr2:170951092-170951114 | +      | 3 | AGGAGGCCTAAATCTTGCA<br>A | AG<br>G | 2965     | -              | Gm14263   | ENSMUSG00000080955 | off-2-1         |
| chr16:75838076-75838098  | -      | 4 | AATGGGCCAAAATCTTGCA<br>A | TGG     | 20695    | -              | Samsn1    | ENSMUSG00000022876 |                 |
| chr8:87839483-87839505   | +      | 4 | AGGTGTACGAATACTTGCA<br>A | TGG     | 19779    | I              | Zfp423    | ENSMUSG00000045333 |                 |
| chr3:129811585-129811607 | -      | 4 | AGAGGTCGGAATCCTTGCA<br>A | TGG     | 4        | I              | Rrh       | ENSMUSG00000028012 |                 |
| chr7:135990910-135990932 | -      | 4 | AAGGGTCCAAATGCTTGCA<br>A | AG<br>G | 37127    | -              | Gm9341    | ENSMUSG00000098031 |                 |
| chr5:47135608-47135630   | -      | 4 | AGGGGCACCAAGTCTTGCA<br>A | GG<br>G | 18021    | -              | Gm43601   | ENSMUSG00000104660 |                 |
| chr13:15618199-15618221  | -      | 4 | TGGGGCCTGAATTATTGCA<br>A | TGG     | 4315     | I              | Gli3      | ENSMUSG00000021318 |                 |
| chr6:18834225-18834247   | +      | 4 | AGTGAGCCCAATTATTGCA<br>A | TGG     | 9166     | -              | Gm5874    | ENSMUSG00000071568 |                 |
| chr5:144326148-144326170 | -      | 4 | AGAGGGCAGAGTCCTTGCA<br>A | GG<br>G | 1516     | I              | Baiap211  | ENSMUSG00000038859 |                 |
| chr2:60634545-60634567   | +      | 4 | AGGGAGCCAACTGCTTGCA<br>A | GG<br>G | 0        | E              | Itgb6     | ENSMUSG00000026971 | off-itgb6       |
| chr16:34004735-34004757  | -      | 4 | TGGGGACCGCATTCTTGCA<br>A | GG<br>G | 4513     | I              | Kalrn     | ENSMUSG00000061751 |                 |
| chr9:101701694-101701716 | -      | 3 | AGGGTGCCAAATTCTGGCA<br>A | GG<br>G | 68656    | -              | Gm29521   | ENSMUSG00000100807 | off-2-2         |

The first row is the on-target information. Efficacy score by CRISPRater: 0.76 MEDIUM. The nucleotides in red indicate those mismatching with the sgRNA. The highlighted off-targets were sequenced in a male mutant. MM: number of mismatched nucleotides. The coordinates of off-targets were based on the GRCm38/mm10 assembly (2011).

**Table S3. Predicted off-targets for sgRNA 3**

| Coordinates              | strand | M | target_seq                | PAM | distance | Intron or exon | gene name     | gene id             | Off-target name |
|--------------------------|--------|---|---------------------------|-----|----------|----------------|---------------|---------------------|-----------------|
| chrX:7158977-7158999     | -      | 0 | GCAATGCTAACTAGT<br>AGACG  | AGG | 0        | E              | Cln5          | ENSMUSG00000004317  |                 |
| chr16:65536691-65536713  | +      | 4 | TCAATATTACCTAGT<br>AGACG  | TGG | 1686     | -              | Pou1f1        | ENSMUSG00000004842  | Off-3-1         |
| chrX:106257785-106257807 | -      | 4 | ACAGTGTAAAGTAGT<br>AGACG  | GGG | 2409     | -              | Fnd3c2        | ENSMUSG000000073012 | Off-3-2         |
| chr9:62530943-62530965   | +      | 4 | TCAATCCCAACTACT<br>AGACG  | GGG | 5688     | I              | Coro2b        | ENSMUSG000000041729 | Off-3-3         |
| chr11:80937879-80937901  | -      | 4 | CCACTGCTAACAAAT<br>AGACG  | TGG | 14579    | I              | Asic2         | ENSMUSG000000020704 |                 |
| chrX:18446775-18446797   | -      | 4 | GGAATCCTGACTAGT<br>ATACG  | TGG | 781      | I              | 4930578C19Rik | ENSMUSG000000037358 | Off-3-4         |
| chr2:75105387-75105409   | -      | 4 | CCAAGGCTAACTAAT<br>AGGCG  | GGG | 19462    | -              | Gm13652       | ENSMUSG000000087333 |                 |
| chr7:81835546-81835568   | +      | 4 | GCAAAGCTAAGTAGA<br>AAACG  | GGG | 6115     | -              | Btbd1         | ENSMUSG000000025103 |                 |
| chr3:9472233-9472255     | +      | 4 | GCAAAGATGACTAGT<br>AGACT  | AGG | 1115     | I              | Zfp704        | ENSMUSG000000040209 |                 |
| chr3:99318004-99318026   | -      | 4 | GGAATGTTAACCAAGT<br>AGACA | AGG | 1646     | I              | Tbx15         | ENSMUSG000000027868 |                 |
| chr6:86859252-86859274   | -      | 4 | GCAATGACAGCTAGT<br>AGACC  | TGG | 3599     | I              | RP24-467O4.3  | ENSMUSG000000108216 |                 |
| chr4:4847984-4848006     | +      | 4 | GCAATAATAACTAGA<br>AGAAG  | AGG | 54629    | -              | Impad1        | ENSMUSG000000066324 |                 |
| chr18:28959114-28959136  | +      | 4 | GCAATTCTAGCCAGT<br>AGACA  | GGG | NA       | -              | NA            | NA                  |                 |
| chr1:152795360-152795382 | -      | 4 | GCAAGGCTGACTGGT<br>AGACA  | GGG | 4812     | -              | Ncf2          | ENSMUSG000000026480 |                 |
| chr3:109170448-109170470 | +      | 4 | GGAATGCTAACTCGT<br>CGTCG  | TGG | 1991     | -              | Slc25a24      | ENSMUSG000000040322 |                 |

The first row is the on-target information. Efficacy score by CRISPRater: 0.66 MEDIUM. The nucleotides in red indicate those mismatching with the sgRNA. The highlighted off-targets were sequenced in a male mutant. MM: number of mismatched nucleotides. The coordinates of off-targets were based on the GRCm38/mm10 assembly (2011).

**Table S4. All off-targets for sgRNA1 predicted with CRISPOR.**

| Number of mismatch | Position   | gene                        |
|--------------------|------------|-----------------------------|
| 3                  | intergenic | Mturn-Znrf2                 |
| 4                  | intergenic | Six2-Srbd1                  |
| 4                  | intergenic | Cetn3-Mir3961               |
| 4                  | intron     | Smim14                      |
| 4                  | intergenic | Gm715-Sox3                  |
| 4                  | intron     | LOC108167736                |
| 4                  | intron     | Fig4                        |
| 3                  | intron     | Camkmt                      |
| 4                  | intron     | Rgs6                        |
| 4                  | intergenic | Gm17634-Pign                |
| 4                  | intron     | Gnaq                        |
| 4                  | intergenic | Timd2-Havcr1                |
| 4                  | intergenic | Trim12-Zfp42                |
| 4                  | intergenic | Atp6v1h-Oprk1               |
| 4                  | intergenic | Lmo7-Kctd12/Mir5130         |
| 4                  | intergenic | Galr3-Ankrd54               |
| 3                  | intergenic | D3Ertd751e-2610316D01Rik    |
| 4                  | intron     | Zswim6                      |
| 4                  | intron     | Mefv                        |
| 4                  | intergenic | Fstl5-Rapgef2               |
| 4                  | intergenic | B230216N24Rik-Pam           |
| 4                  | intergenic | Gm32200-Dtl                 |
| 4                  | intergenic | Plxdc2-4930515L03Rik        |
| 4                  | intron     | Ptk2                        |
| 4                  | intergenic | Cypt15-Cypt14               |
| 4                  | intergenic | Tenm3-Gm2516                |
| 3                  | intron     | Camta1                      |
| 4                  | intergenic | Erich3-Tnni3k               |
| 4                  | intron     | Rasal2                      |
| 4                  | exon       | Nup214                      |
| 4                  | intergenic | Ctps2-Grpr                  |
| 4                  | intron     | 1700034P13Rik               |
| 4                  | intergenic | Arrb1-Tpbgl                 |
| 4                  | intron     | Adam3                       |
| 4                  | intergenic | Nav3-9230102K24Rik          |
| 3                  | intergenic | Gm13582-Tank                |
| 4                  | intergenic | Mir6899-Klf7                |
| 4                  | intergenic | Stox2-Trappc11              |
| 4                  | intron     | Fryl                        |
| 4                  | intron     | Tacr1                       |
| 4                  | intron     | Iqck                        |
| 4                  | intergenic | 9330178D15Rik-4930570G19Rik |
| 4                  | intergenic | Anapc4-5033403H07Rik        |
| 4                  | intergenic | Hnf4g-1110015O18Rik         |
| 4                  | exon       | Gfi1                        |
| 4                  | intron     | Hormad1                     |
| 4                  | intergenic | Slc9a9-Chst2                |
| 4                  | intron     | Arid1a                      |
| 4                  | intron     | Prdm1                       |
| 4                  | intergenic | Gm1653-Gm40178              |
| 4                  | intron     | Celf2                       |
| 4                  | intron     | Defb1                       |
| 4                  | intergenic | 4930563F08Rik-Auts2         |
| 4                  | intergenic | Edn1-Phactr1                |
| 4                  | intron     | Etv6                        |
| 4                  | intergenic | Gm36793-Gm36851             |
| 4                  | intron     | Pde6g                       |
| 4                  | intergenic | MacroD2-Kif16b              |
| 4                  | intron     | Ppp2r3a                     |
| 4                  | intron     | Ldah                        |
| 3                  | intergenic | Tmem161b-Ccnh               |
| 4                  | intergenic | Boc-Nepro                   |
| 4                  | intergenic | Usp3-Car12                  |
| 4                  | intergenic | Rbfox1-Tmem114              |
| 4                  | intron     | Fars2                       |
| 4                  | intergenic | Kbtbd12-Mgll                |
| 4                  | intergenic | Ttc6-Sstr1                  |
| 4                  | intron     | Fli1                        |
| 4                  | intergenic | Xrcc2-Actr3b                |
| 4                  | intergenic | Olfr875-Olfr876             |
| 4                  | intergenic | Tusc1-Caap1                 |
| 4                  | intergenic | 8430430B14Rik-4933433H22Rik |
| 4                  | intergenic | PsmD7-Gm39244               |
| 4                  | intron     | Ush2a                       |
| 4                  | intron     | Slc44a5                     |
| 4                  | intergenic | Gap43-4932412D23Rik         |

**Table S5. All off-targets for sgRNA2 predicted with CRISPOR.**

| Number of mismatch | Position   | Gene                     |
|--------------------|------------|--------------------------|
| 3                  | intergenic | Dok5-1700028P15Rik       |
| 4                  | intergenic | Pcdh20-Gm5088            |
| 4                  | intron     | Cacna1c                  |
| 4                  | intergenic | Slc45a4-Gpr20            |
| 4                  | intron     | Rrh                      |
| 4                  | intergenic | Baiap211-Baiap211/Dmrt1i |
| 4                  | intergenic | Slitrk1-Slitrk6          |
| 4                  | intergenic | Pabpc2-Yipf5             |
| 4                  | intergenic | 1700120G07Rik-Nps        |
| 4                  | intergenic | Hspa13-Samsn1            |
| 4                  | intron     | Gli3                     |
| 4                  | intergenic | D030045P18Rik-Grik2      |
| 4                  | exon       | Yipf5                    |
| 4                  | intergenic | Trim72-Itgam             |
| 4                  | intron     | Slco2a1                  |
| 4                  | intergenic | Gm7931-Slit2             |
| 4                  | intergenic | Mettl21c-Gm8251          |
| 4                  | intron     | Dab1                     |
| 4                  | intron     | Zfp423                   |
| 4                  | intron     | 4930442J19Rik            |
| 4                  | intron     | LOC100125594             |
| 4                  | intron     | Gm14144                  |
| 4                  | intergenic | Ppp1cb-Gm15614           |
| 4                  | intergenic | 6330420H09Rik-Gm51502    |
| 4                  | intron     | Cbll1                    |
| 4                  | intron     | Sag                      |

|   |            |                       |
|---|------------|-----------------------|
| 4 | intron     | Kalrn                 |
| 4 | intergenic | Gm29461-Slco6d1       |
| 4 | intergenic | Ctnnbp2-Lsm8          |
| 4 | intron     | Sgo2a                 |
| 4 | intergenic | Ccn2-Enpp1            |
| 4 | exon       | Gm33104               |
| 4 | intergenic | Phf8-Huwe1            |
| 4 | exon       | Cox14                 |
| 4 | intron     | Adgrf5                |
| 4 | exon       | Dmpk                  |
| 4 | intron     | Dscaml1               |
| 3 | intergenic | Gm28979-Ephb1         |
| 4 | intron     | Nedd9                 |
| 4 | intergenic | Gm21054-Cntn6         |
| 4 | intron     | Itgb6                 |
| 4 | intron     | Mitf                  |
| 4 | intergenic | Oxsm-B230110C06Rik    |
| 3 | intergenic | Cyb5a-Fbxo15          |
| 4 | intergenic | Ksr1-Wsb1             |
| 4 | intron     | Matn2                 |
| 4 | intron     | Coq3                  |
| 4 | intergenic | Mir672-Nexmif         |
| 4 | intergenic | Irf2bp2-A630001O12Rik |
| 4 | exon       | Cadm4                 |
| 4 | intron     | Atp10a                |
| 4 | intergenic | Papss1-Dkk2           |
| 4 | exon       | Steap2                |
| 4 | intron     | Dpysl5                |
| 4 | intergenic | Aass-4930554P06Rik    |
| 4 | intron     | Etv6                  |

**Table S6. All off-targets for sgRNA3 predicted with CRISPOR.**

| Number of mismatch | Position   | Gene                                |
|--------------------|------------|-------------------------------------|
| 4                  | intron     | Tbx15                               |
| 4                  | intron     | Cacna2d3                            |
| 4                  | intergenic | 4930474G06Rik/Gm33948-4930474G06Rik |
| 4                  | intron     | Coro2b                              |
| 4                  | intergenic | Pou1f1-Chmp2b                       |
| 4                  | intergenic | Arpc5-Ncf2                          |
| 4                  | intergenic | Hgf-Gm28710                         |
| 4                  | intergenic | H2ab1-Tgif2lx2/Tgif2lx1             |
| 3                  | intron     | Kcnp4                               |
| 4                  | intergenic | Bpnt2-4930423M02Rik                 |
| 4                  | intron     | Aak1                                |
| 4                  | intron     | Zfp704                              |
| 4                  | intron     | Asic2                               |
| 4                  | intergenic | Mtx2-Rps6-ps4                       |
| 4                  | intergenic | Tango6-Has3                         |
| 4                  | intergenic | Fnd3c2-Mir6382                      |
| 4                  | intergenic | Unc5d-4933433F19Rik                 |
| 4                  | intergenic | 4933402C06Rik-A230077H06Rik         |

|   |            |                   |
|---|------------|-------------------|
| 4 | exon       | Tuft1             |
| 4 | intron     | Sh3rf3            |
| 4 | intergenic | Tmem64-Calb1      |
| 4 | intron     | Dipk2b            |
| 4 | intergenic | Btbd1-Tm6sf1      |
| 4 | intergenic | Grb10-Cobl        |
| 4 | intron     | Rtn4rl1           |
| 4 | intron     | Nim1k             |
| 4 | intron     | Nxph1             |
| 4 | intron     | Mief1             |
| 4 | intron     | Cfap44            |
| 4 | intergenic | Olf142-Olfr1271   |
| 4 | intergenic | Olfr1271-Olfr1272 |
| 4 | intergenic | Airn-Mas1         |
| 4 | intergenic | Vapb-Stx16        |
| 4 | intron     | Osbp13            |
| 4 | intergenic | Scgb1b24-Scgb2b26 |
| 4 | intergenic | Dhrs2-Dhrs4       |
| 4 | intergenic | Gm30662-Akap11    |
| 4 | intron     | Atxn7             |
| 4 | intron     | Sema5b            |
| 4 | intergenic | Slc25a24-Vav3     |
| 4 | intergenic | Ghitm-Nrg3        |

**Table S7 MIQE reporter for *Clcn3* gene expression in wild type and *Clcn5* mutant mice**

| <b><i>Clcn3</i> gene expression in wild type and <i>Clcn5</i> mutant mice</b> |                                                                                                                                                                                                                                                                                                                                                                   |
|-------------------------------------------------------------------------------|-------------------------------------------------------------------------------------------------------------------------------------------------------------------------------------------------------------------------------------------------------------------------------------------------------------------------------------------------------------------|
| <b>Experimental design</b>                                                    |                                                                                                                                                                                                                                                                                                                                                                   |
| Definition of experimental and control groups                                 | Confirming the <i>Clcn3</i> mRNA expression in wild type and mutant                                                                                                                                                                                                                                                                                               |
| Number within each group                                                      | 2 wild type and 2 mutant mice                                                                                                                                                                                                                                                                                                                                     |
| Assay carried out by the core                                                 | WFIRM core facility                                                                                                                                                                                                                                                                                                                                               |
| <b>Sample</b>                                                                 |                                                                                                                                                                                                                                                                                                                                                                   |
| Description                                                                   | Kidney samples                                                                                                                                                                                                                                                                                                                                                    |
| Volume /mass of sample processed                                              | 20ul                                                                                                                                                                                                                                                                                                                                                              |
| Processing procedure                                                          | Kidney was homogenized and processed with miRNeasy Mini Kit (Cat No. 217004, QIAGEN, Germantown, MD)                                                                                                                                                                                                                                                              |
| If frozen, how quickly                                                        | -80 degree                                                                                                                                                                                                                                                                                                                                                        |
| If fixed with what and how quickly                                            | Kidney was put in liquid nitrogen and frozen - 80 degree                                                                                                                                                                                                                                                                                                          |
| Sample storage conditions and duration                                        | -80 degree, 1-2 months                                                                                                                                                                                                                                                                                                                                            |
| <b>Nucleic acid extraction</b>                                                |                                                                                                                                                                                                                                                                                                                                                                   |
| Procedure and instrumentation                                                 | miRNeasy Mini Kit (Cat No. 217004, QIAGEN, Germantown, MD) procedure used                                                                                                                                                                                                                                                                                         |
| Name of kit and details of any modifications                                  | miRNeasy Mini Kit (Cat No. 217004, QIAGEN, Germantown, MD)                                                                                                                                                                                                                                                                                                        |
| Contamination assessment (DNA or RNA)                                         | No contamination observed                                                                                                                                                                                                                                                                                                                                         |
| Nucleic acid quantification                                                   | Nano Drop                                                                                                                                                                                                                                                                                                                                                         |
| Instrument and method                                                         | Nano Drop 2000 Spectrophotometer                                                                                                                                                                                                                                                                                                                                  |
| Purity ( $A_{260}/A_{280}$ )                                                  | 2.02 ratio                                                                                                                                                                                                                                                                                                                                                        |
| RNA integrity: method/instrument                                              | Comparative CT ( $\Delta\Delta CT$ ) and QuantStudio™ 3                                                                                                                                                                                                                                                                                                           |
| RIN/RQI or Cq of 3' and 5' transcripts                                        | N/A                                                                                                                                                                                                                                                                                                                                                               |
| Inhibition testing (Cq dilutions, spike or other)                             | N/A                                                                                                                                                                                                                                                                                                                                                               |
| <b>Reverse transcription</b>                                                  |                                                                                                                                                                                                                                                                                                                                                                   |
| Complete reaction conditions                                                  | Template RNA up to 2ug, 2ul gDNA wiped out buffer, incubated 2 min at 42°C, and then immediately placed on ice, total volume 14ul. Reverse-transcription master mix- Quantiscript Reverse Transcriptase -1ul, Quantiscript RT buffer 5x - 4ul, RT Primer mix-1ul, and Template RAN 14ul. Total reaction volume 20ul, mixed well and incubated at 42°C for 1 hour. |
| Amount of RNA and reaction volume                                             | 2ul RNA, 20ul volume                                                                                                                                                                                                                                                                                                                                              |
| Priming oligonucleotide and concentration                                     | QuantiTect Qiagen -1ul                                                                                                                                                                                                                                                                                                                                            |
| Reverse transcriptase and concentration                                       | QuantiTect Qiagen -1ul                                                                                                                                                                                                                                                                                                                                            |
| Temperature and time                                                          | 1hours 42 degree                                                                                                                                                                                                                                                                                                                                                  |
| Manufacture of reagents and catalogue numbers                                 | Qiagen cat. No. 205314                                                                                                                                                                                                                                                                                                                                            |



|                                                                |                                                                                                                                                                                                                                                                                                                                                                                                                                                                                                                                                                |
|----------------------------------------------------------------|----------------------------------------------------------------------------------------------------------------------------------------------------------------------------------------------------------------------------------------------------------------------------------------------------------------------------------------------------------------------------------------------------------------------------------------------------------------------------------------------------------------------------------------------------------------|
| Storage conditions of cDNA                                     | -80 degree                                                                                                                                                                                                                                                                                                                                                                                                                                                                                                                                                     |
| <b>qPCR target information</b>                                 |                                                                                                                                                                                                                                                                                                                                                                                                                                                                                                                                                                |
| Gene symbol                                                    | CLCN3                                                                                                                                                                                                                                                                                                                                                                                                                                                                                                                                                          |
| Sequence accession number                                      | NM_007711.3                                                                                                                                                                                                                                                                                                                                                                                                                                                                                                                                                    |
| Amplicon length                                                | 108 bp                                                                                                                                                                                                                                                                                                                                                                                                                                                                                                                                                         |
| In silicon specificity screen                                  | <a href="https://pga.mgh.harvard.edu/cgi-bin/primerbank/new_search2.cgi">https://pga.mgh.harvard.edu/cgi-bin/primerbank/new_search2.cgi</a>                                                                                                                                                                                                                                                                                                                                                                                                                    |
| Location of each primer by exon and intron                     | Both in Exon 1                                                                                                                                                                                                                                                                                                                                                                                                                                                                                                                                                 |
| What splice variants are targeted                              | transcript variant b                                                                                                                                                                                                                                                                                                                                                                                                                                                                                                                                           |
| <b>qPCR oligonucleotides</b>                                   |                                                                                                                                                                                                                                                                                                                                                                                                                                                                                                                                                                |
| Primer sequence                                                | CLCN3-<br>F: AGCTACAACAGCATAACCAGC<br>CLCN3-<br>R: GTCCCCGTCTAACAAATTGTCAT                                                                                                                                                                                                                                                                                                                                                                                                                                                                                     |
| RTPrimerDB identification number                               | 2599550a1                                                                                                                                                                                                                                                                                                                                                                                                                                                                                                                                                      |
| <b>Manufacturer of oligonucleotides</b>                        |                                                                                                                                                                                                                                                                                                                                                                                                                                                                                                                                                                |
| Purification method                                            | Reversed-phase HPLC followed by anion exchange HPLC                                                                                                                                                                                                                                                                                                                                                                                                                                                                                                            |
| RT-qPCR protocol                                               | In this method RNA First transcribe in to cDNA by reverse transcriptase from total RNA and cDNA was used as the template for the RT-qPCR                                                                                                                                                                                                                                                                                                                                                                                                                       |
| Complete reaction condition                                    | 50 °C-2, 95 °C-10 min Hold, 95 °C -15 sec, 60 °C- 1 min PCR -40X, 95 °C-15 sec, 60 °C 1 min, 95 °C-1 sec Melt Curve                                                                                                                                                                                                                                                                                                                                                                                                                                            |
| Reaction volume and amount of cDNA                             | 20ul reaction volume and 2ul cDNA                                                                                                                                                                                                                                                                                                                                                                                                                                                                                                                              |
| Primer, Mg <sup>2+</sup> and dNTP concentration                | SYBR™ Green PCR Master Mix-2x cat. 4367659                                                                                                                                                                                                                                                                                                                                                                                                                                                                                                                     |
| Polymerase identity and concentration                          | SYBR™ Green PCR Master Mix-2x cat. 4367659                                                                                                                                                                                                                                                                                                                                                                                                                                                                                                                     |
| Buffer/kit identity and manufacturer                           | Applied Biosystems by Thermo Fisher Scientific, life technologies # 4367659                                                                                                                                                                                                                                                                                                                                                                                                                                                                                    |
| <b>Exact chemical composition of the buffer</b>                |                                                                                                                                                                                                                                                                                                                                                                                                                                                                                                                                                                |
| SYBR™ Green PCR Master Mix<br>TaqMan™ Universal PCR Master Mix | Power SYBR Green PCR Master Mix cat. 4367659<br>The 2X mix contains SYBR™ Green 1 Dye, AmpliTaq Gold DNA Polymerase LD, dNTPs with dUTP/dTTP blend, Passive Reference 1, and optimized buffer components. Contains 1 × 5 mL, sufficient for 200 reactions.<br><br>TaqMan™ Universal PCR Master Mix cat. 4304437<br>Supplied at 2X concentration. The mix contains AmpliTaq Gold™ DNA Polymerase, Uracil-DNA Glycosylase, dNTPs with dUTP, Passive Reference 1 and optimized buffer components. This pack contains one 5 mL tube, sufficient for 200 reactions. |

|                                                       |                                                       |
|-------------------------------------------------------|-------------------------------------------------------|
|                                                       |                                                       |
| Manufacturer of plates/tubes and cat number           | Applied Biosystems by life technologies cat. N8010568 |
| Reaction setup (manual/robotic)                       | Manual                                                |
| Manufacturer of qPCR instrument                       | Applied Biosystems by Thermo Fisher Scientific        |
| <b>Results for NTCs</b>                               |                                                       |
| Justification of number and choice of reference genes | Three technical replicates and Gapdh                  |
| Description of normalization method                   | Internal control gene                                 |
| Number and concordance of biological replicates       | Triplicates                                           |
| Repeatability (intraassay variation)                  |                                                       |
| Statistical methods for results significance          | Not performed due to less sample groups               |
| Software (source, version)                            | Not used due to less sample groups                    |

**Table S8 MIQE reporter for *Clcn4* gene expression in wild type and *Clcn5* mutant mice**

| <b>Clcn4 gene expression in wild type and Clcn5 mutant mice</b> |                                                                                                                                                                                                                                                                                                                                                                   |
|-----------------------------------------------------------------|-------------------------------------------------------------------------------------------------------------------------------------------------------------------------------------------------------------------------------------------------------------------------------------------------------------------------------------------------------------------|
| Item to check                                                   | Item used for RT-qPCR                                                                                                                                                                                                                                                                                                                                             |
| <b>Experimental design</b>                                      |                                                                                                                                                                                                                                                                                                                                                                   |
| Definition of experimental and control groups                   | Confirming the <i>Clcn4</i> mRNA expression in wild type and mutant                                                                                                                                                                                                                                                                                               |
| Number within each group                                        | 2 wild type and 2 mutant mice                                                                                                                                                                                                                                                                                                                                     |
| Assay carried out by the core                                   | WFIRM core facility                                                                                                                                                                                                                                                                                                                                               |
| <b>Sample</b>                                                   |                                                                                                                                                                                                                                                                                                                                                                   |
| Description                                                     | Kidney samples                                                                                                                                                                                                                                                                                                                                                    |
| Volume /mass of sample processed                                | 20ul                                                                                                                                                                                                                                                                                                                                                              |
| Processing procedure                                            | Kidney was homogenized and processed with miRNeasy Mini Kit (Cat No. 217004, QIAGEN, Germantown, MD)                                                                                                                                                                                                                                                              |
| If frozen, how quickly                                          | -80 degree                                                                                                                                                                                                                                                                                                                                                        |
| If fixed with what and how quickly                              | Kidney was put in liquid nitrogen and frozen - 80 degree                                                                                                                                                                                                                                                                                                          |
| Sample storage conditions and duration                          | -80 degree, 1-2 months                                                                                                                                                                                                                                                                                                                                            |
| <b>Nucleic acid extraction</b>                                  |                                                                                                                                                                                                                                                                                                                                                                   |
| Procedure and instrumentation                                   | miRNeasy Mini Kit (Cat No. 217004, QIAGEN, Germantown, MD) procedure used                                                                                                                                                                                                                                                                                         |
| Name of kit and details of any modifications                    | miRNeasy Mini Kit (Cat No. 217004, QIAGEN, Germantown, MD)                                                                                                                                                                                                                                                                                                        |
| Contamination assessment (DNA or RNA)                           | No contamination observed                                                                                                                                                                                                                                                                                                                                         |
| Nucleic acid quantification                                     | Nano Drop                                                                                                                                                                                                                                                                                                                                                         |
| Instrument and method                                           | Nano Drop 2000 Spectrophotometer                                                                                                                                                                                                                                                                                                                                  |
| Purity ( $A_{260}/A_{280}$ )                                    | 2.0 ratio                                                                                                                                                                                                                                                                                                                                                         |
| RNA integrity: method/instrument                                | Comparative CT ( $\Delta\Delta CT$ ) and QuantStudio™ 3                                                                                                                                                                                                                                                                                                           |
| RIN/RQI or Cq of 3' and 5' transcripts                          | N/A                                                                                                                                                                                                                                                                                                                                                               |
| Inhibition testing (Cq dilutions, spike or other)               | N/A                                                                                                                                                                                                                                                                                                                                                               |
| <b>Reverse transcription</b>                                    |                                                                                                                                                                                                                                                                                                                                                                   |
| Complete reaction conditions                                    | Template RNA up to 2ug, 2ul gDNA wiped out buffer, incubated 2 min at 42°C, and then immediately placed on ice, total volume 14ul. Reverse-transcription master mix- Quantiscript Reverse Transcriptase -1ul, Quantiscript RT buffer 5x - 4ul, RT Primer mix-1ul, and Template RAN 14ul. Total reaction volume 20ul, mixed well and incubated at 42°C for 1 hour. |
| Amount of RNA and reaction volume                               | 2ul RNA, 20ul volume                                                                                                                                                                                                                                                                                                                                              |
| Priming oligonucleotide and concentration                       | QuantiTect Qiagen -1ul                                                                                                                                                                                                                                                                                                                                            |
| Reverse transcriptase and concentration                         | QuantiTect Qiagen -1ul                                                                                                                                                                                                                                                                                                                                            |
| Temperature and time                                            | 1hours 42 degree                                                                                                                                                                                                                                                                                                                                                  |
| Manufacture of reagents and catalogue numbers                   | Qiagen cat. No. 205314                                                                                                                                                                                                                                                                                                                                            |

|                                                                |                                                                                                                                                                                                                                                                                                                                                                                                                                                                                                                                                                |
|----------------------------------------------------------------|----------------------------------------------------------------------------------------------------------------------------------------------------------------------------------------------------------------------------------------------------------------------------------------------------------------------------------------------------------------------------------------------------------------------------------------------------------------------------------------------------------------------------------------------------------------|
| Storage conditions of cDNA                                     | -80 degree                                                                                                                                                                                                                                                                                                                                                                                                                                                                                                                                                     |
| <b>qPCR target information</b>                                 |                                                                                                                                                                                                                                                                                                                                                                                                                                                                                                                                                                |
| Gene symbol                                                    | CLCN4                                                                                                                                                                                                                                                                                                                                                                                                                                                                                                                                                          |
| Sequence accession number                                      | NM_011334                                                                                                                                                                                                                                                                                                                                                                                                                                                                                                                                                      |
| Amplicon length                                                | 175 bp                                                                                                                                                                                                                                                                                                                                                                                                                                                                                                                                                         |
| In silicon specificity screen                                  | <a href="https://pga.mgh.harvard.edu/cgi-bin/primerbank/new_search2.cgi">https://pga.mgh.harvard.edu/cgi-bin/primerbank/new_search2.cgi</a>                                                                                                                                                                                                                                                                                                                                                                                                                    |
| Location of each primer by exon and intron                     | Both in Exon 1                                                                                                                                                                                                                                                                                                                                                                                                                                                                                                                                                 |
| What splice variants are targeted                              | transcript variant a                                                                                                                                                                                                                                                                                                                                                                                                                                                                                                                                           |
| <b>qPCR oligonucleotides</b>                                   |                                                                                                                                                                                                                                                                                                                                                                                                                                                                                                                                                                |
| Primer sequence                                                | CLCN4-<br>F: CGGGATACCGACAGACATAGG<br>CLCN4-<br>R: TGAGGTCCGTCATCCAATCCA                                                                                                                                                                                                                                                                                                                                                                                                                                                                                       |
| RTPrimerDB identification number                               | 110625939c1                                                                                                                                                                                                                                                                                                                                                                                                                                                                                                                                                    |
| <b>Manufacturer of oligonucleotides</b>                        | Eurofins Genomics LLC                                                                                                                                                                                                                                                                                                                                                                                                                                                                                                                                          |
| Purification method                                            | Reversed-phase HPLC followed by anion exchange HPLC                                                                                                                                                                                                                                                                                                                                                                                                                                                                                                            |
| RT-qPCR protocol                                               | In this method RNA First transcribe in to cDNA by reverse transcriptase from total RNA and cDNA was used as the template for the RT-qPCR                                                                                                                                                                                                                                                                                                                                                                                                                       |
| Complete reaction condition                                    | 50 °C-2, 95 °C-10 min Hold, 95 °C -15 sec, 60 °C- 1 min PCR -40X, 95 °C-15 sec, 60 °C 1 min, 95 °C-1 sec Melt Curve                                                                                                                                                                                                                                                                                                                                                                                                                                            |
| Reaction volume and amount of cDNA                             | 20ul reaction volume and 2ul cDNA                                                                                                                                                                                                                                                                                                                                                                                                                                                                                                                              |
| Primer, Mg <sup>2+</sup> and dNTP concentration                | SYBR™ Green PCR Master Mix-2x cat. 4367659                                                                                                                                                                                                                                                                                                                                                                                                                                                                                                                     |
| Polymerase identity and concentration                          | SYBR™ Green PCR Master Mix-2x cat. 4367659                                                                                                                                                                                                                                                                                                                                                                                                                                                                                                                     |
| Buffer/kit identity and manufacturer                           | Applied Biosystems by Thermo Fisher Scientific, life technologies # 4367659                                                                                                                                                                                                                                                                                                                                                                                                                                                                                    |
| <b>Exact chemical composition of the buffer</b>                |                                                                                                                                                                                                                                                                                                                                                                                                                                                                                                                                                                |
| SYBR™ Green PCR Master Mix<br>TaqMan™ Universal PCR Master Mix | Power SYBR Green PCR Master Mix cat. 4367659<br>The 2X mix contains SYBR™ Green 1 Dye, AmpliTaq Gold DNA Polymerase LD, dNTPs with dUTP/dTTP blend, Passive Reference 1, and optimized buffer components. Contains 1 × 5 mL, sufficient for 200 reactions.<br><br>TaqMan™ Universal PCR Master Mix cat. 4304437<br>Supplied at 2X concentration. The mix contains AmpliTaq Gold™ DNA Polymerase, Uracil-DNA Glycosylase, dNTPs with dUTP, Passive Reference 1 and optimized buffer components. This pack contains one 5 mL tube, sufficient for 200 reactions. |

|                                                       |                                                       |
|-------------------------------------------------------|-------------------------------------------------------|
|                                                       |                                                       |
| Manufacturer of plates/tubes and cat number           | Applied Biosystems by life technologies cat. N8010568 |
| Reaction setup (manual/robotic)                       | Manual                                                |
| Manufacturer of qPCR instrument                       | Applied Biosystems by Thermo Fisher Scientific        |
| <b>Results for NTCs</b>                               |                                                       |
| Justification of number and choice of reference genes | Three technical replicates and Gapdh                  |
| Description of normalization method                   | Internal control gene                                 |
| Number and concordance of biological replicates       | Triplicates                                           |
| Repeatability (intraassay variation)                  |                                                       |
| Statistical methods for results significance          | Not performed due to less sample groups               |
| Software (source, version)                            | Not used due to less sample groups                    |

**Table S9 MIQE reporter for *CLCN5* gene expression in HEK293T cells with and without *CLCN5* LV transduction**

| <b><i>CLCN5</i> gene expression in HEK293T cells with and without <i>CLCN5</i> LV transduction</b> |                                                                                                                                                                                                                                                                                                                                                                   |
|----------------------------------------------------------------------------------------------------|-------------------------------------------------------------------------------------------------------------------------------------------------------------------------------------------------------------------------------------------------------------------------------------------------------------------------------------------------------------------|
| Item to check                                                                                      | Item used for RT-qPCR                                                                                                                                                                                                                                                                                                                                             |
| <b>Experimental design</b>                                                                         |                                                                                                                                                                                                                                                                                                                                                                   |
| Definition of experimental and control groups                                                      | RT-qPCR confirmed LV vector mediated <i>CLCN5</i> mRNA expression in HEK293T cells. GFP- <i>CLCN5</i> expressing lentiviral vectors (10 ng p24) were transduced into 2.5x10 <sup>4</sup> HEK293T cells.                                                                                                                                                           |
| Number within each group                                                                           | 3 in each group                                                                                                                                                                                                                                                                                                                                                   |
| Assay carried out by the core                                                                      | WFIRM core facility                                                                                                                                                                                                                                                                                                                                               |
| <b>Sample</b>                                                                                      |                                                                                                                                                                                                                                                                                                                                                                   |
| Description                                                                                        | Transduced 293T cell samples                                                                                                                                                                                                                                                                                                                                      |
| Volume /mass of sample processed                                                                   | Cell pallet directly 350 RLT Plus Buffer                                                                                                                                                                                                                                                                                                                          |
| Processing procedure                                                                               | Followed miRNeasy Mini Kit (Cat No. 217004, QIAGEN, Germantown, MD)                                                                                                                                                                                                                                                                                               |
| If frozen, how quickly                                                                             | Not frozen                                                                                                                                                                                                                                                                                                                                                        |
| If fixed with what and how quickly                                                                 | Not fixed                                                                                                                                                                                                                                                                                                                                                         |
| Sample storage conditions and duration                                                             | Not stored                                                                                                                                                                                                                                                                                                                                                        |
| <b>Nucleic acid extraction</b>                                                                     |                                                                                                                                                                                                                                                                                                                                                                   |
| Procedure and instrumentation                                                                      | miRNeasy Mini Kit (Cat No. 217004, QIAGEN, Germantown, MD)                                                                                                                                                                                                                                                                                                        |
| Name of kit and details of any modifications                                                       | miRNeasy Mini Kit (Cat No. 217004, QIAGEN, Germantown, MD)                                                                                                                                                                                                                                                                                                        |
| Contamination assessment (DNA or RNA)                                                              | No contamination observed                                                                                                                                                                                                                                                                                                                                         |
| Nucleic acid quantification                                                                        | Nano Drop                                                                                                                                                                                                                                                                                                                                                         |
| Instrument and method                                                                              | Nano Drop 2000 Spectrophotometer                                                                                                                                                                                                                                                                                                                                  |
| Purity (A <sub>260</sub> /A <sub>280</sub> )                                                       | 2.02 ratio                                                                                                                                                                                                                                                                                                                                                        |
| RNA integrity: method/instrument                                                                   | Comparative CT ( $\Delta\Delta$ CT) and QuantStudio™ 3                                                                                                                                                                                                                                                                                                            |
| RIN/RQI or Cq of 3' and 5' transcripts                                                             | N/A                                                                                                                                                                                                                                                                                                                                                               |
| Inhibition testing (Cq dilutions, spike or other)                                                  | N/A                                                                                                                                                                                                                                                                                                                                                               |
| <b>Reverse transcription</b>                                                                       |                                                                                                                                                                                                                                                                                                                                                                   |
| Complete reaction conditions                                                                       | Template RNA up to 2ug, 2ul gDNA wiped out buffer, incubated 2 min at 42°C, and then immediately placed on ice, total volume 14ul. Reverse-transcription master mix- Quantiscript Reverse Transcriptase -1ul, Quantiscript RT buffer 5x - 4ul, RT Primer mix-1ul, and Template RAN 14ul. Total reaction volume 20ul, mixed well and incubated at 42°C for 1 hour. |
| Amount of RNA and reaction volume                                                                  | 2ul RNA, 20ul volume                                                                                                                                                                                                                                                                                                                                              |
| Priming oligonucleotide and concentration                                                          | QuantiTect Qiagen -1ul                                                                                                                                                                                                                                                                                                                                            |
| Reverse transcriptase and concentration                                                            | QuantiTect Qiagen -1ul                                                                                                                                                                                                                                                                                                                                            |

|                                                                |                                                                                                                                                                                                                                                                                                                                                                                                                                                                                    |
|----------------------------------------------------------------|------------------------------------------------------------------------------------------------------------------------------------------------------------------------------------------------------------------------------------------------------------------------------------------------------------------------------------------------------------------------------------------------------------------------------------------------------------------------------------|
| Temperature and time                                           | 1hours 42 degree                                                                                                                                                                                                                                                                                                                                                                                                                                                                   |
| Manufacture of reagents and catalogue numbers                  | Qiagen cat. No. 205314                                                                                                                                                                                                                                                                                                                                                                                                                                                             |
| Storage conditions of cDNA                                     | -80 degree                                                                                                                                                                                                                                                                                                                                                                                                                                                                         |
| <b>qPCR target information</b>                                 |                                                                                                                                                                                                                                                                                                                                                                                                                                                                                    |
| Gene symbol                                                    | <i>CLCN5</i>                                                                                                                                                                                                                                                                                                                                                                                                                                                                       |
| Sequence accession number                                      | NM_000084.5                                                                                                                                                                                                                                                                                                                                                                                                                                                                        |
| Amplicon length                                                | 209 bp                                                                                                                                                                                                                                                                                                                                                                                                                                                                             |
| In silicon specificity screen                                  | Designed with Primer3 Input (Version 0.4.0)                                                                                                                                                                                                                                                                                                                                                                                                                                        |
| Location of each primer by exon and intron                     | N/A                                                                                                                                                                                                                                                                                                                                                                                                                                                                                |
| What splice variants are targeted                              | Codon optimized human <i>CLCN5</i> cDNA                                                                                                                                                                                                                                                                                                                                                                                                                                            |
| <b>qPCR oligonucleotides</b>                                   |                                                                                                                                                                                                                                                                                                                                                                                                                                                                                    |
| Primer sequence                                                | hCLCN5-F-<br>TCTCGCCATGGATGTTATGA<br>hCLCN5-R- TCTTGCGTGCGTTTTCTATG                                                                                                                                                                                                                                                                                                                                                                                                                |
| RTPrimerDB identification number                               |                                                                                                                                                                                                                                                                                                                                                                                                                                                                                    |
| <b>Manufacturer of oligonucleotides</b>                        | Eurofins Genomics LLC                                                                                                                                                                                                                                                                                                                                                                                                                                                              |
| Purification method                                            | Reversed-phase HPLC followed by anion exchange HPLC                                                                                                                                                                                                                                                                                                                                                                                                                                |
| RT-qPCR protocol                                               | In this method RNA First transcribe in to cDNA by reverse transcriptase from total RNA and cDNA was used as the template for the RT-qPCR                                                                                                                                                                                                                                                                                                                                           |
| Complete reaction condition                                    | 50 °C-2, 95 °C-10 min Hold, 95 °C -15 sec, 60 °C- 1 min PCR -40X, 95 °C-15 sec, 60 °C 1 min, 95 °C-1 sec Melt Curve                                                                                                                                                                                                                                                                                                                                                                |
| Reaction volume and amount of cDNA                             | 20ul reaction volume and 2ul cDNA                                                                                                                                                                                                                                                                                                                                                                                                                                                  |
| Primer, Mg <sup>2+</sup> and dNTP concentration                | SYBR™ Green PCR Master Mix-2x cat. 4367659                                                                                                                                                                                                                                                                                                                                                                                                                                         |
| Polymerase identity and concentration                          | SYBR™ Green PCR Master Mix-2x cat. 4367659                                                                                                                                                                                                                                                                                                                                                                                                                                         |
| Buffer/kit identity and manufacturer                           | Applied Biosystems by Thermo Fisher Scientific, life technologies # 4367659                                                                                                                                                                                                                                                                                                                                                                                                        |
| <b>Exact chemical composition of the buffer</b>                |                                                                                                                                                                                                                                                                                                                                                                                                                                                                                    |
| SYBR™ Green PCR Master Mix<br>TaqMan™ Universal PCR Master Mix | Power SYBR Green PCR Master Mix cat. 4367659<br>The 2X mix contains SYBR™ Green 1 Dye, AmpliTaq Gold DNA Polymerase LD, dNTPs with dUTP/dTTP blend, Passive Reference 1, and optimized buffer components. Contains 1 × 5 mL, sufficient for 200 reactions.<br><br>TaqMan™ Universal PCR Master Mix cat. 4304437<br>Supplied at 2X concentration. The mix contains AmpliTaq Gold™ DNA Polymerase, Uracil-DNA Glycosylase, dNTPs with dUTP, Passive Reference 1 and optimized buffer |

|                                                       |                                                                             |
|-------------------------------------------------------|-----------------------------------------------------------------------------|
|                                                       | components. This pack contains one 5 mL tube, sufficient for 200 reactions. |
| Manufacturer of plates/tubes and cat number           | Applied Biosystems by life technologies cat. N8010568                       |
| Reaction setup (manual/robotic)                       | Manual                                                                      |
| Manufacturer of qPCR instrument                       | Applied Biosystems by Thermo Fisher Scientific                              |
| <b>Results for NTCs</b>                               |                                                                             |
| Justification of number and choice of reference genes | Three technical replicates and Gapdh                                        |
| Description of normalization method                   | Internal control gene                                                       |
| Number and concordance of biological replicates       | Triplicates                                                                 |
| Repeatability (intraassay variation)                  | N/A                                                                         |
| Statistical methods for results significance          | Not performed due to less sample groups                                     |
| Software (source, version)                            | Not used due to less sample groups                                          |



**Table S10 MIQE reporter for LV DNA in different organs following GFP LV delivery**

|                                                                     |                                                                                                                |
|---------------------------------------------------------------------|----------------------------------------------------------------------------------------------------------------|
| Confirming the GFP LV delivery in injected mice of different organs |                                                                                                                |
| Item to check                                                       | Item used for qPCR                                                                                             |
| <b>Experimental design</b>                                          |                                                                                                                |
| Definition of experimental and control groups                       | Confirming the GFP LV delivery in injected mice of different organs                                            |
| Number within each group                                            | 2 wild type and 2 mutant mice                                                                                  |
| Assay carried out by the core                                       | WFIRM core facility                                                                                            |
| <b>Sample</b>                                                       |                                                                                                                |
| Description                                                         | Kidney, Bladder, Heart, Liver, Muscle, Spleen, Testis samples were collected and homogenized for DNA isolation |
| Volume /mass of sample processed                                    | 200ul                                                                                                          |
| Processing procedure                                                | Organs samples homogenized and processed DNeasy Blood & Tissue Kit (Qiagen) cat. No. 69504 and 69505           |
| If frozen, how quickly                                              | Kidney was put in liquid nitrogen and frozen - 80 degree                                                       |
| Sample storage conditions and duration                              | -80 degree, 1-2 months                                                                                         |
| <b>Nucleic acid extraction</b>                                      |                                                                                                                |
| Procedure and instrumentation                                       | DNeasy Blood & Tissue Kit (Qiagen) cat. No. 69504 and 69505                                                    |
| Name of kit and details of any modifications                        | DNeasy Blood & Tissue Kit (Qiagen) cat. No. 69504 and 69505                                                    |
| Contamination assessment (DNA or RNA)                               | No contamination observed                                                                                      |
| Nucleic acid quantification                                         | Nano Drop                                                                                                      |
| Instrument and method                                               | Nano Drop 2000 Spectrophotometer                                                                               |
| Purity (A <sub>260</sub> /A <sub>280</sub> )                        | 1.9 ratio                                                                                                      |
| Method/instrument                                                   | Comparative CT ( $\Delta\Delta CT$ ) and QuantStudio™ 3                                                        |
| RIN/RQI or Cq of 3' and 5' transcripts                              | N/A                                                                                                            |
| Inhibition testing (Cq dilutions, spike or other)                   | N/A                                                                                                            |
| <b>qPCR target information</b>                                      |                                                                                                                |
| Gene symbol                                                         | EGFP                                                                                                           |
| Sequence accession number                                           | MW987528.1                                                                                                     |
| Amplicon length                                                     | 187 bp                                                                                                         |
| In silicon specificity screen                                       | Designed with Primer3 Input (Version 0.4.0)                                                                    |
| Location of each primer by exon and intron                          | N/A                                                                                                            |
| What splice variants are targeted                                   | N/A                                                                                                            |
| <b>qPCR oligonucleotides</b>                                        |                                                                                                                |
| Primer sequence                                                     | GFPP: acgtaaacggccacaagttc<br>GFPR: aagtcgtgctgcttcattg                                                        |
| RTPrimerDB identification number                                    | N/A                                                                                                            |
| <b>Manufacturer of oligonucleotides</b>                             |                                                                                                                |
| Purification method                                                 | Reversed-phase HPLC followed by anion exchange HPLC                                                            |

|                                                                |                                                                                                                                                                                                                                                                                                                                                                                                                                                                                                                                                                |
|----------------------------------------------------------------|----------------------------------------------------------------------------------------------------------------------------------------------------------------------------------------------------------------------------------------------------------------------------------------------------------------------------------------------------------------------------------------------------------------------------------------------------------------------------------------------------------------------------------------------------------------|
| qPCR protocol                                                  | In this method DNA isolated from different organs was used as the template for the qPCR                                                                                                                                                                                                                                                                                                                                                                                                                                                                        |
| Complete reaction condition                                    | 50 °C-2, 95 °C-10 min Hold, 95 °C -15 sec, 60 °C- 1 min PCR -40X, 95 °C-15 sec, 60 °C 1 min, 95 °C-1 sec Melt Curve                                                                                                                                                                                                                                                                                                                                                                                                                                            |
| Reaction volume and amount of DNA                              | 20ul reaction volume and 2ul DNA                                                                                                                                                                                                                                                                                                                                                                                                                                                                                                                               |
| Primer, Mg <sup>2+</sup> and dNTP concentration                | SYBR™ Green PCR Master Mix-2x cat. 4367659                                                                                                                                                                                                                                                                                                                                                                                                                                                                                                                     |
| Polymerase identity and concentration                          | SYBR™ Green PCR Master Mix-2x cat. 4367659                                                                                                                                                                                                                                                                                                                                                                                                                                                                                                                     |
| Buffer/kit identity and manufacturer                           | Applied Biosystems by Thermo Fisher Scientific, life technologies # 4367659                                                                                                                                                                                                                                                                                                                                                                                                                                                                                    |
| <b>Exact chemical composition of the buffer</b>                |                                                                                                                                                                                                                                                                                                                                                                                                                                                                                                                                                                |
| SYBR™ Green PCR Master Mix<br>TaqMan™ Universal PCR Master Mix | Power SYBR Green PCR Master Mix cat. 4367659<br>The 2X mix contains SYBR™ Green 1 Dye, AmpliTaq Gold DNA Polymerase LD, dNTPs with dUTP/dTTP blend, Passive Reference 1, and optimized buffer components. Contains 1 × 5 mL, sufficient for 200 reactions.<br><br>TaqMan™ Universal PCR Master Mix cat. 4304437<br>Supplied at 2X concentration. The mix contains AmpliTaq Gold™ DNA Polymerase, Uracil-DNA Glycosylase, dNTPs with dUTP, Passive Reference 1 and optimized buffer components. This pack contains one 5 mL tube, sufficient for 200 reactions. |
| Manufacturer of plates/tubes and cat number                    | Applied Biosystems by life technologies cat. N8010568                                                                                                                                                                                                                                                                                                                                                                                                                                                                                                          |
| Reaction setup (manual/robotic)                                | Manual                                                                                                                                                                                                                                                                                                                                                                                                                                                                                                                                                         |
| Manufacturer of qPCR instrument                                | Applied Biosystems by Thermo Fisher Scientific                                                                                                                                                                                                                                                                                                                                                                                                                                                                                                                 |
| <b>Results for NTCs</b>                                        |                                                                                                                                                                                                                                                                                                                                                                                                                                                                                                                                                                |
| Justification of number and choice of reference genes          | Three technical replicates and Gapdh                                                                                                                                                                                                                                                                                                                                                                                                                                                                                                                           |
| Description of normalization method                            | Internal control gene                                                                                                                                                                                                                                                                                                                                                                                                                                                                                                                                          |
| Number and concordance of biological replicates                | Triplicates                                                                                                                                                                                                                                                                                                                                                                                                                                                                                                                                                    |
| Repeatability (intraassay variation)                           |                                                                                                                                                                                                                                                                                                                                                                                                                                                                                                                                                                |
| Statistical methods for results significance                   | Not performed due to less sample groups                                                                                                                                                                                                                                                                                                                                                                                                                                                                                                                        |
| Software (source, version)                                     | Not used due to less sample groups                                                                                                                                                                                                                                                                                                                                                                                                                                                                                                                             |

**Table S11 MIQE reporter for LV DNA in the kidneys of mice following the first and second *CLCN5* LV delivery**

| Confirming the gDNA Psi signal for LV DNA in the kidneys of mice following the first and second <i>CLCN5</i> LV delivery |                                                                                                                          |
|--------------------------------------------------------------------------------------------------------------------------|--------------------------------------------------------------------------------------------------------------------------|
| Item to check                                                                                                            | Item used for qPCR                                                                                                       |
| <b>Experimental design</b>                                                                                               |                                                                                                                          |
| Definition of experimental and control groups                                                                            | Confirming the gDNA Psi signal for LV DNA in the kidneys of mice following the first and second <i>CLCN5</i> LV delivery |
| Number within each group                                                                                                 | 3 in each group                                                                                                          |
| Assay carried out by the core                                                                                            | WFIRM core facility                                                                                                      |
| <b>Sample</b>                                                                                                            |                                                                                                                          |
| Description                                                                                                              | Kidney samples were collected and homogenized for DNA isolation                                                          |
| Volume /mass of sample processed                                                                                         | 200ul                                                                                                                    |
| Processing procedure                                                                                                     | Kidney samples homogenized and processed DNeasy Blood & Tissue Kit (Qiagen) cat. No. 69504 and 69505                     |
| If frozen, how quickly                                                                                                   | Kidney was put in liquid nitrogen and frozen - 80 degree                                                                 |
| Sample storage conditions and duration                                                                                   | -80 degree, 1-2 months                                                                                                   |
| <b>Nucleic acid extraction</b>                                                                                           |                                                                                                                          |
| Procedure and instrumentation                                                                                            | DNeasy Blood & Tissue Kit (Qiagen) cat. No. 69504 and 69505 procedure used                                               |
| Name of kit and details of any modifications                                                                             | DNeasy Blood & Tissue Kit (Qiagen) cat. No. 69504 and 69505                                                              |
| Contamination assessment (DNA or RNA)                                                                                    | No contamination observed                                                                                                |
| Nucleic acid quantification                                                                                              | Nano Drop                                                                                                                |
| Instrument and method                                                                                                    | Nano Drop 2000 Spectrophotometer                                                                                         |
| Purity ( $A_{260}/A_{280}$ )                                                                                             | 1.9 ratio                                                                                                                |
| Method/instrument                                                                                                        | Comparative CT ( $\Delta\Delta CT$ ) and QuantStudio™ 3                                                                  |
| RIN/RQI or Cq of 3' and 5' transcripts                                                                                   | N/A                                                                                                                      |
| Inhibition testing (Cq dilutions, spike or other)                                                                        | N/A                                                                                                                      |
| <b>qPCR target information</b>                                                                                           |                                                                                                                          |
| Gene symbol                                                                                                              | A region near HIV-1 LTR/gag                                                                                              |
| Sequence accession number                                                                                                | K03455.1                                                                                                                 |
| Amplicon length                                                                                                          | 127 bp                                                                                                                   |
| In silicon specificity screen                                                                                            | Based on Nat. Protoc., 3 (7) (2008), pp. 1240-1248                                                                       |
| Location of each primer by exon and intron                                                                               | N/A                                                                                                                      |
| What splice variants are targeted                                                                                        | Human immunodeficiency virus type 1 (HXB2)                                                                               |
| <b>qPCR oligonucleotides</b>                                                                                             |                                                                                                                          |
| Primer sequence                                                                                                          | Psi-F: TCTCGACGCAGGACTCG<br>Psi-R: TACTGACGCTCTCGCACC                                                                    |
| RTPrimerDB identification number                                                                                         | N/A                                                                                                                      |

|                                                                |                                                                                                                                                                                                                                                                                                                                                                                                                                                                                                                                                                |
|----------------------------------------------------------------|----------------------------------------------------------------------------------------------------------------------------------------------------------------------------------------------------------------------------------------------------------------------------------------------------------------------------------------------------------------------------------------------------------------------------------------------------------------------------------------------------------------------------------------------------------------|
| <b>Manufacturer of oligonucleotides</b>                        | Eurofins Genomics LLC                                                                                                                                                                                                                                                                                                                                                                                                                                                                                                                                          |
| Purification method                                            | Reversed-phase HPLC followed by anion exchange HPLC                                                                                                                                                                                                                                                                                                                                                                                                                                                                                                            |
| qPCR protocol                                                  | In this method DNA isolated from different organs was used as the template for the qPCR                                                                                                                                                                                                                                                                                                                                                                                                                                                                        |
| Complete reaction condition                                    | 50 °C-2, 95 °C-10 min Hold, 95 °C -15 sec, 60 °C- 1 min PCR -40X, 95 °C-15 sec, 60 °C 1 min, 95 °C-1 sec Melt Curve                                                                                                                                                                                                                                                                                                                                                                                                                                            |
| Reaction volume and amount of DNA                              | 20ul reaction volume and 2ul DNA                                                                                                                                                                                                                                                                                                                                                                                                                                                                                                                               |
| Primer, Mg <sup>2+</sup> and dNTP concentration                | SYBR™ Green PCR Master Mix-2x cat. 4367659                                                                                                                                                                                                                                                                                                                                                                                                                                                                                                                     |
| Polymerase identity and concentration                          | SYBR™ Green PCR Master Mix-2x cat. 4367659                                                                                                                                                                                                                                                                                                                                                                                                                                                                                                                     |
| Buffer/kit identity and manufacturer                           | Applied Biosystems by Thermo Fisher Scientific, life technologies # 4367659                                                                                                                                                                                                                                                                                                                                                                                                                                                                                    |
| <b>Exact chemical composition of the buffer</b>                |                                                                                                                                                                                                                                                                                                                                                                                                                                                                                                                                                                |
| SYBR™ Green PCR Master Mix<br>TaqMan™ Universal PCR Master Mix | Power SYBR Green PCR Master Mix cat. 4367659<br>The 2X mix contains SYBR™ Green 1 Dye, AmpliTaq Gold DNA Polymerase LD, dNTPs with dUTP/dTTP blend, Passive Reference 1, and optimized buffer components. Contains 1 × 5 mL, sufficient for 200 reactions.<br><br>TaqMan™ Universal PCR Master Mix cat. 4304437<br>Supplied at 2X concentration. The mix contains AmpliTaq Gold™ DNA Polymerase, Uracil-DNA Glycosylase, dNTPs with dUTP, Passive Reference 1 and optimized buffer components. This pack contains one 5 mL tube, sufficient for 200 reactions. |
| Manufacturer of plates/tubes and cat number                    | Applied Biosystems by life technologies cat. N8010568                                                                                                                                                                                                                                                                                                                                                                                                                                                                                                          |
| Reaction setup (manual/robotic)                                | Manual                                                                                                                                                                                                                                                                                                                                                                                                                                                                                                                                                         |
| Manufacturer of qPCR instrument                                | Applied Biosystems by Thermo Fisher Scientific                                                                                                                                                                                                                                                                                                                                                                                                                                                                                                                 |
| <b>Results for NTCs</b>                                        |                                                                                                                                                                                                                                                                                                                                                                                                                                                                                                                                                                |
| Justification of number and choice of reference genes          | Three technical replicates and Gapdh                                                                                                                                                                                                                                                                                                                                                                                                                                                                                                                           |
| Description of normalization method                            | Internal control gene                                                                                                                                                                                                                                                                                                                                                                                                                                                                                                                                          |
| Number and concordance of biological replicates                | Triplicates                                                                                                                                                                                                                                                                                                                                                                                                                                                                                                                                                    |
| Repeatability (intraassay variation)                           |                                                                                                                                                                                                                                                                                                                                                                                                                                                                                                                                                                |
| Statistical methods for results significance                   | Not performed due to less sample groups                                                                                                                                                                                                                                                                                                                                                                                                                                                                                                                        |
| Software (source, version)                                     | Not used due to less sample groups                                                                                                                                                                                                                                                                                                                                                                                                                                                                                                                             |

**Table S12 MIQE reporter for *CLCN5* expression in the kidneys of mice following the first and second *CLCN5* LV delivery**

| <b><i>CLCN5</i> expression in the kidneys of mice following the first and second <i>CLCN5</i> LV delivery</b> |                                                                                                                                                                                                                                                                                                                                                                   |
|---------------------------------------------------------------------------------------------------------------|-------------------------------------------------------------------------------------------------------------------------------------------------------------------------------------------------------------------------------------------------------------------------------------------------------------------------------------------------------------------|
| Item to check                                                                                                 | Item used for RT-qPCR                                                                                                                                                                                                                                                                                                                                             |
| <b>Experimental design</b>                                                                                    |                                                                                                                                                                                                                                                                                                                                                                   |
| Definition of experimental and control groups                                                                 | Confirming the <i>Cln5</i> mRNA expression in injected and not injected <i>CLCN5</i> LV mice.                                                                                                                                                                                                                                                                     |
| Number within each group                                                                                      | 2 wild type and 2 mutant mice                                                                                                                                                                                                                                                                                                                                     |
| Assay carried out by the core                                                                                 | WFIRM core facility                                                                                                                                                                                                                                                                                                                                               |
| <b>Sample</b>                                                                                                 |                                                                                                                                                                                                                                                                                                                                                                   |
| Description                                                                                                   | Kidney samples                                                                                                                                                                                                                                                                                                                                                    |
| Volume /mass of sample processed                                                                              | 200ul                                                                                                                                                                                                                                                                                                                                                             |
| Processing procedure                                                                                          | Kidney was homogenized and processed with miRNeasy Mini Kit (Cat No. 217004, QIAGEN, Germantown, MD)                                                                                                                                                                                                                                                              |
| If frozen, how quickly                                                                                        | -80 degree                                                                                                                                                                                                                                                                                                                                                        |
| If fixed with what and how quickly                                                                            | Kidney was put in liquid nitrogen and frozen - 80 degree                                                                                                                                                                                                                                                                                                          |
| Sample storage conditions and duration                                                                        | -80 degree, 1-2 months                                                                                                                                                                                                                                                                                                                                            |
| <b>Nucleic acid extraction</b>                                                                                |                                                                                                                                                                                                                                                                                                                                                                   |
| Procedure and instrumentation                                                                                 | miRNeasy Mini Kit (Cat No. 217004, QIAGEN, Germantown, MD) procedure used                                                                                                                                                                                                                                                                                         |
| Name of kit and details of any modifications                                                                  | miRNeasy Mini Kit (Cat No. 217004, QIAGEN, Germantown, MD)                                                                                                                                                                                                                                                                                                        |
| Contamination assessment (DNA or RNA)                                                                         | No contamination observed                                                                                                                                                                                                                                                                                                                                         |
| Nucleic acid quantification                                                                                   | Nano Drop                                                                                                                                                                                                                                                                                                                                                         |
| Instrument and method                                                                                         | Nano Drop 2000 Spectrophotometer                                                                                                                                                                                                                                                                                                                                  |
| Purity ( $A_{260}/A_{280}$ )                                                                                  | 2.0 ratio                                                                                                                                                                                                                                                                                                                                                         |
| RNA integrity: method/instrument                                                                              | Comparative CT ( $\Delta\Delta CT$ ) and QuantStudio™ 3                                                                                                                                                                                                                                                                                                           |
| RIN/RQI or Cq of 3' and 5' transcripts                                                                        | N/A                                                                                                                                                                                                                                                                                                                                                               |
| Inhibition testing (Cq dilutions, spike or other)                                                             | N/A                                                                                                                                                                                                                                                                                                                                                               |
| <b>Reverse transcription</b>                                                                                  |                                                                                                                                                                                                                                                                                                                                                                   |
| Complete reaction conditions                                                                                  | Template RNA up to 2ug, 2ul gDNA wiped out buffer, incubated 2 min at 42°C, and then immediately placed on ice, total volume 14ul. Reverse-transcription master mix- Quantiscript Reverse Transcriptase -1ul, Quantiscript RT buffer 5x - 4ul, RT Primer mix-1ul, and Template RAN 14ul. Total reaction volume 20ul, mixed well and incubated at 42°C for 1 hour. |
| Amount of RNA and reaction volume                                                                             | 2ul RNA, 20ul volume                                                                                                                                                                                                                                                                                                                                              |
| Priming oligonucleotide and concentration                                                                     | QuantiTect Qiagen -1ul                                                                                                                                                                                                                                                                                                                                            |
| Reverse transcriptase and concentration                                                                       | QuantiTect Qiagen -1ul                                                                                                                                                                                                                                                                                                                                            |
| Temperature and time                                                                                          | 1hours 42 degree                                                                                                                                                                                                                                                                                                                                                  |

|                                                                |                                                                                                                                                                                                                                                                                                                                                                                                                                                                                                                                                                |
|----------------------------------------------------------------|----------------------------------------------------------------------------------------------------------------------------------------------------------------------------------------------------------------------------------------------------------------------------------------------------------------------------------------------------------------------------------------------------------------------------------------------------------------------------------------------------------------------------------------------------------------|
| Manufacture of reagents and catalogue numbers                  | Qiagen cat. No. 205314                                                                                                                                                                                                                                                                                                                                                                                                                                                                                                                                         |
| Storage conditions of cDNA                                     | -80 degree                                                                                                                                                                                                                                                                                                                                                                                                                                                                                                                                                     |
| <b>qPCR target information</b>                                 |                                                                                                                                                                                                                                                                                                                                                                                                                                                                                                                                                                |
| Gene symbol                                                    | CLCN5                                                                                                                                                                                                                                                                                                                                                                                                                                                                                                                                                          |
| Sequence accession number                                      | NM_000084.5                                                                                                                                                                                                                                                                                                                                                                                                                                                                                                                                                    |
| Amplicon length                                                | 209 bp                                                                                                                                                                                                                                                                                                                                                                                                                                                                                                                                                         |
| In silicon specificity screen                                  | Designed with Primer3 Input (Version 0.4.0)                                                                                                                                                                                                                                                                                                                                                                                                                                                                                                                    |
| Location of each primer by exon and intron                     | N/A                                                                                                                                                                                                                                                                                                                                                                                                                                                                                                                                                            |
| What splice variants are targeted                              | Codon optimized human <i>CLCN5</i> cDNA                                                                                                                                                                                                                                                                                                                                                                                                                                                                                                                        |
| <b>qPCR oligonucleotides</b>                                   |                                                                                                                                                                                                                                                                                                                                                                                                                                                                                                                                                                |
| Primer sequence                                                | hCLCN5-F(cDNA)-<br>TCTCGCCATGGATGTTATGA hCLCN5-<br>R(cDNA)- TCTTGCGTGCGTTTTCTATG                                                                                                                                                                                                                                                                                                                                                                                                                                                                               |
| RTPrimerDB identification number                               | N/A                                                                                                                                                                                                                                                                                                                                                                                                                                                                                                                                                            |
| <b>Manufacturer of oligonucleotides</b>                        | Eurofins Genomics LLC                                                                                                                                                                                                                                                                                                                                                                                                                                                                                                                                          |
| Purification method                                            | Reversed-phase HPLC followed by anion exchange HPLC                                                                                                                                                                                                                                                                                                                                                                                                                                                                                                            |
| RT-qPCR protocol                                               | In this method RNA First transcribe in to cDNA by reverse transcriptase from total RNA and cDNA was used as the template for the RT-qPCR                                                                                                                                                                                                                                                                                                                                                                                                                       |
| Complete reaction condition                                    | 50 °C-2, 95 °C-10 min Hold, 95 °C -15 sec, 60 °C- 1 min PCR -40X, 95 °C-15 sec, 60 °C 1 min, 95 °C-1 sec Melt Curve                                                                                                                                                                                                                                                                                                                                                                                                                                            |
| Reaction volume and amount of cDNA                             | 20ul reaction volume and 2ul cDNA                                                                                                                                                                                                                                                                                                                                                                                                                                                                                                                              |
| Primer, Mg <sup>2+</sup> and dNTP concentration                | SYBR™ Green PCR Master Mix-2x cat. 4367659                                                                                                                                                                                                                                                                                                                                                                                                                                                                                                                     |
| Polymerase identity and concentration                          | SYBR™ Green PCR Master Mix-2x cat. 4367659                                                                                                                                                                                                                                                                                                                                                                                                                                                                                                                     |
| Buffer/kit identity and manufacturer                           | Applied Biosystems by Thermo Fisher Scientific, life technologies # 4367659                                                                                                                                                                                                                                                                                                                                                                                                                                                                                    |
| <b>Exact chemical composition of the buffer</b>                |                                                                                                                                                                                                                                                                                                                                                                                                                                                                                                                                                                |
| SYBR™ Green PCR Master Mix<br>TaqMan™ Universal PCR Master Mix | Power SYBR Green PCR Master Mix cat. 4367659<br>The 2X mix contains SYBR™ Green 1 Dye, AmpliTaq Gold DNA Polymerase LD, dNTPs with dUTP/dTTP blend, Passive Reference 1, and optimized buffer components. Contains 1 × 5 mL, sufficient for 200 reactions.<br><br>TaqMan™ Universal PCR Master Mix cat. 4304437<br>Supplied at 2X concentration. The mix contains AmpliTaq Gold™ DNA Polymerase, Uracil-DNA Glycosylase, dNTPs with dUTP, Passive Reference 1 and optimized buffer components. This pack contains one 5 mL tube, sufficient for 200 reactions. |

|                                                       |                                                       |
|-------------------------------------------------------|-------------------------------------------------------|
|                                                       |                                                       |
| Manufacturer of plates/tubes and cat number           | Applied Biosystems by life technologies cat. N8010568 |
| Reaction setup (manual/robotic)                       | Manual                                                |
| Manufacturer of qPCR instrument                       | Applied Biosystems by Thermo Fisher Scientific        |
| <b>Results for NTCs</b>                               |                                                       |
| Justification of number and choice of reference genes | Three technical replicates and Gapdh                  |
| Description of normalization method                   | Internal control gene                                 |
| Number and concordance of biological replicates       | Triplicates                                           |
| Repeatability (intraassay variation)                  | N/A                                                   |
| Statistical methods for results significance          | Not performed due to less sample groups               |
| Software (source, version)                            | Not used due to less sample groups                    |

**Table S13. Sequence information for codon-optimized human CLCN5 cDNA**

| Name                                    | Sequence                                                                                                                                                                                                                                                                                                                                                                                                                                                                                                                                                                                                                                                                                                                                                                                                                                                                                                                                                                                                                                                                                                                                                                                                                                                                                                                                                                                                                                                                                                                                                                                                                                                                                                                                                                                                                                                                                                                                                                                                                                                                                                                                                                                                                                                                                                                                                                                                                                                                                                |
|-----------------------------------------|---------------------------------------------------------------------------------------------------------------------------------------------------------------------------------------------------------------------------------------------------------------------------------------------------------------------------------------------------------------------------------------------------------------------------------------------------------------------------------------------------------------------------------------------------------------------------------------------------------------------------------------------------------------------------------------------------------------------------------------------------------------------------------------------------------------------------------------------------------------------------------------------------------------------------------------------------------------------------------------------------------------------------------------------------------------------------------------------------------------------------------------------------------------------------------------------------------------------------------------------------------------------------------------------------------------------------------------------------------------------------------------------------------------------------------------------------------------------------------------------------------------------------------------------------------------------------------------------------------------------------------------------------------------------------------------------------------------------------------------------------------------------------------------------------------------------------------------------------------------------------------------------------------------------------------------------------------------------------------------------------------------------------------------------------------------------------------------------------------------------------------------------------------------------------------------------------------------------------------------------------------------------------------------------------------------------------------------------------------------------------------------------------------------------------------------------------------------------------------------------------------|
| Codon optimized human <i>CLCN5</i> cDNA | <p>ctcgageccacc<b>ATG</b>GATTCCTgGAGGAACCAATACCAGGTGTAGGAACATATGACGATTT<br/> CAATACTATAGACTGGGTGCGAGAGAAATCACGCGATCGAGACAGACACCGGGGAGA<br/> TCACGAATAAGTCTAAGGAATCTACCTGGGCCCTCATTACAGTGTGTCAGACGCTT<br/> TTAGCGGATGGCTGCTTATGCTTCTGATTGGACTTCTTAGTGGTAGTTTGGCGGGCCT<br/> GATAGACATTAGCGCGCACTGGATGACTGATCTTAAAGAAGGCATATGCACGGGGG<br/> GATTTTGGTTCAACCACGAACATTGCTGCTGGAACCTCCGAGCATGTGACATTCGAGG<br/> AGAGGGACAAGTGCCCCGAGTGGAATAGTTGGAGCCAACCTGATAATTTCTACAGAT<br/> GAGGGGGCTTTTGCCTATATAGTTAATTATTCATGTATGTTTTGTGGGGCCCTCCTCTT<br/> CGCCTTCTCGCGGTATCCCTCGTTAAGGTCTTTGCCCATATGCCTGTGGCTCTGGT<br/> ATTCCAGAAATAAAAACCTATCCTTTCTGGATTTATAATCAGGGGATATCTGGGCAAG<br/> TGGACGTTGGTCATTAAGACAATCACCTTGCCTTGCTGTATCTTCAGGGTTGTCCT<br/> TGGGCAAAGAGGGTCTCTCGTTCACGTAGCTTGCTGCTGTGGGAACATCCTTTGCC<br/> ATTGTTTCAATAAATATAGGAAGAACGAAGCAAAGCGCCGAGAAGTTCTGAGCGCA<br/> GCAGCGGCCGCAGGTGTCAGTGTGCTTTCGGGGCTCCTATAGGAGGGGTACTGTTT<br/> AGTCTCGAAGAAGTGTCAATTACTTTCTCTCAAGACACTGTGGAGGTCTTTTTTTG<br/> CAGCCCTGGTTCGCGGCTTTTACTCTGCGCTCTATTAATCCTTTTGGAAACAGCAGACT<br/> TGTGCTGTTCTACGTTCGAATTCACACCCCGTGGCATTGTTTTGAACTCGTACCCTTT<br/> ATTTTGTGTTGGGATTTTCGGTGGATTGTGGGGTGTCTGTTCATACGCACTAACATTG<br/> CGTGGTGCCGGAAGAGGAAGACTACTCAGTTGGGCAAATACCCAGTTATTGAGGTCC<br/> TCGTCGTTACAGCTATCACAGCAATTCCTTGCCTTCCCAACGAGTACACACGGATGTC<br/> TACATCCGAACCTGATTAGCGAACTGTTCAATGATTGTGGGCTCTTGGACTCCTCAA<br/> ACTGTGCGATTATGAAAATCGATTTAATACATCAAAGGGCGGAGAACTTCCCGATCG<br/> GCCGGCTGGAGTGGGAGTATACTCCGCTATGTGGCAGCTGGCGTTGACGCTCATACT<br/> CAAATCGTCATTACCATATTCATTTTGGAAATGAAGATTCCCTCAGGTCTCTTTATC<br/> CCTAGTATGGCAGTTGGTGCATTGCGGGACGGCTCCTGGGCGTTGGCATGGAGCAG<br/> CTGGCTTATTACCATCAGGAGTGGACCGTATTCAATAGCTGGTGTCTCAGGGCGCT<br/> GATTGCATCACACCAGGCCTGTATGCCATGGTAGGCGCTGCTGCTTGTCTTGGAGGG<br/> GTGACTAGGATGACGGTTTCTCTCGTCGTGATAATGTTTCGAGCTTACTGGGGGTCTTG<br/> AGTACATTGTGCCCTGATGGCGGCGGCAATGACATCCAAATGGGTGGCGGATGCGT<br/> TGGGTAGGGAAGGGATATACGATGCACATATTCGCCTTAATGGCTACCCATTTTTGG<br/> AGGCTAAGGAAGAATTTGCACATAAACTCTCGCCATGGATGTTATGAAACCGAGAC<br/> GAAACGACCCATTGCTTACAGTACTTACACAGGATTCCATGACCGTTGAGGACGTGG<br/> AAACAATAATATCTGAAACAACCTTATAGTGGCTTTCCCGTCGTCGTATCCCGAGAAT<br/> CACAAAGGTTGGTAGGATTCGTGCTGCGACGCGACCTGATCATATCCATAGAAAACG<br/> CACGCAAGAAGCAAGACGGGGTAGTGTCCACGTCTATAATTTATTTACCGAGCATA<br/> GCCCTCCCTTGCTCCATATACTCCGCTACACTGAAACTTCGAAACATCCTCGATTT<br/> GTCTCCTTTTACAGTAACCGACCTTACTCCAATGGAAATCGTAGTAGACATATTTAGA<br/> AAGCTTGGATTGAGGCAATGCCTGGTTACCCACAACGGTTCGGTTGCTCGGGATAATA</p> |



|                           |                                                                                                                                                                                                                                                                                                                                                                                                                                                                                                                                                                                                                                                                                                                                                                                                                         |
|---------------------------|-------------------------------------------------------------------------------------------------------------------------------------------------------------------------------------------------------------------------------------------------------------------------------------------------------------------------------------------------------------------------------------------------------------------------------------------------------------------------------------------------------------------------------------------------------------------------------------------------------------------------------------------------------------------------------------------------------------------------------------------------------------------------------------------------------------------------|
|                           | ACGAAGAAGGACGTACTCAAACATATAGCACAAATGGCAAACCAGGACCCgGATTC<br>AATCTTGTTCAACTAGtctaga                                                                                                                                                                                                                                                                                                                                                                                                                                                                                                                                                                                                                                                                                                                                      |
| Human<br>CLCN5<br>Protein | MDFLEEPIPGVGTYDDFNTIDWVREKSRDRDRHREITNKSKESTWALIHVSDAFSGWLL<br>MLLIGLLSGSLAGLIDISAHWMTDLKEGICTGGFWFNHEHCCWNSEHVTFEERDKCPEW<br>NSWSQLIISTDEGAFAYIVNYFMYVLWALLFAFLAVSLVKVFAPYACGSGIPEIKTILSGFI<br>IRGYLGKWTLVIKTITLVLA VSSGLSLGKEGPLVHVACCCGNILCHCFNKYRKNEAKRRE<br>VLSAAAAAGVSVAFGAPIGGVLFSLLEEVSYFPLKTLWRSFFAALVAAFTLRSINPFGNS<br>RLVLFYVEFHTPWHLFELVPFILLGIFGGLWGALFIRTNIAWCRKRKTTQLGKYPVIEVLV<br>VTAITAILAFPNEYTRMSTSELISELFNDCGLLDSSKLCDYENRFNTSKGGELPDRPAGVG<br>VYSAMWQLALTLILKIVITIFTFGMKIPSGLFIPSMVGAIAGRLLGVGMEQLAYYHQEW<br>TVFNSWCSQGADCITPGLYAMVGAAACLGGVTRMTVSLVVIMFELTGGLEYIVPLMAA<br>AMTSKWWADALGREGIYDAHIRLNGYPFLEAKEEFAHKTAMDVMKPRRNDPLLTVLT<br>QDSMTVEDVETISETTYSGFPVVVSRESQRLVGFVLRDLIISIENARKKQDGVVSTSIIFY<br>TEHSPPLPPYTPPTLKLRLNLDLSPFTVTDLTPMEIVVDIFRKLGLRQCLVTHNGRLLGIITK<br>KDVLKHIAQMANQDPDSILFN* |

**Table S14. Sequence information for primers**

| Name           | Sequence                  | Purpose                                                                                                  |
|----------------|---------------------------|----------------------------------------------------------------------------------------------------------|
| hCLCN5-F(cDNA) | TCTCGCCATGGATGTT<br>ATGA  | RT-qPCR to detect transgene <i>hCLCN5</i> expression.                                                    |
| hCLCN5-R(cDNA) | TCTTGCGTGCGTTTTTC<br>TATG |                                                                                                          |
| mCLCN5-EF:     | CCCTGGTGTAGGGAC<br>CTATG  | RT-PCR to detect endogenous mouse <i>Clcn5</i> expression.                                               |
| mCLCN5-ER      | CAGAATTCCAGCAAC<br>AGTGC  |                                                                                                          |
| CLCN5-KF2      | AAGGGACAGTCATGG<br>TCTGG  | To amplify a 1000 bp DNA product from <i>Clcn5</i> knockout mice but not wild type mice. For genotyping. |
| CLCN5-KR2      | CAATGGCCTGTTGTG<br>CATAAC |                                                                                                          |
| CLCN5-W2       | CTGGGTTTCATGCATT<br>TGTG  | To amplify a 540 bp product from wild type mice with primer CLCN5-KF2. For genotyping.                   |
| Psi-F          | TCTCGACGCAGGACT<br>CG     | For detecting lentiviral genomic DNA integration.                                                        |
| Psi-R          | TACTGACGCTCTCGC<br>ACC    |                                                                                                          |
| Itgb6-F        | TCAGTTGCATGGATG<br>GAGAG  | To amplify predicted off-target of sgRNA 1 in <i>Itgb6</i> gene.                                         |
| Itgb6-R        | AAGCTGAACTTTGCC<br>CTTAGC |                                                                                                          |
| CLCN5-off-1-1F | AAACACACCTCACTG<br>GCAAAG | To amplify predicted off-target of sgRNA 1 7264 bp away from <i>Mturn</i> .                              |
| CLCN5-off-1-1R | GAATTCTCTCCAGGC<br>TGCTG  |                                                                                                          |
| CLCN5-off-1-2F | GTACGCCAGTGTTGA<br>TGTGG  | To amplify predicted off-target of sgRNA 1 40747 bp away from <i>Camkmt</i> .                            |
| CLCN5-off-1-2R | TGCGACACCAGTCAG<br>ATAGC  |                                                                                                          |
| CLCN5-off-1-3F | CTCAAATGCAATTCC<br>CTTCC  | To amplify predicted off-target of sgRNA 1 in a intergenic region on chromosome 3.                       |
| CLCN5-off-1-3R | CCACTGGCATGCACA<br>TCTAC  |                                                                                                          |
| CLCN5-off-2-1F | CAAAGATCCTCTGCC<br>TCTGC  |                                                                                                          |
| CLCN5-off-2-1R | TCTGGCCTTCATTTTT<br>ACCG  | To amplify predicted off-target of sgRNA 2 in a intergenic region on chromosome 3.                       |
| CLCN5-off-2-2F | TTAATTCCCAATGCG<br>GTAGC  |                                                                                                          |
| CLCN5-off-2-2R | ATTCAAGAGGTGGGT<br>TCACG  |                                                                                                          |
| CLCN5-off-2-3F | TGATCTGCAGGGAAC<br>AGTTG  | To amplify predicted off-target of sgRNA 2 in the intron of <i>Cacna1c</i> on chromosome 6.              |

|                 |                          |                                                                                              |
|-----------------|--------------------------|----------------------------------------------------------------------------------------------|
| CLCN5-off-2-3R  | GCCTCTGGTACCTTG<br>CTCAG |                                                                                              |
| CLCN5-off-3-1F  | ATGGCTCCAAGAATC<br>CAGTG | To amplify predicted off-target of sgRNA 3 in an intergenic region 1686 bp from Pou1f1 gene. |
| CLCN5-off-3-1R  | ACCCCTCCTGATTTCT<br>GTGC |                                                                                              |
| CLCN5-off-3-2F  | GGACCCTCCCACATC<br>CTAAC | To amplify predicted off-target of sgRNA 3 in an intergenic region 2409 bp from Fnd3c2 gene. |
| CLCN5-off-3-2R: | GTCCCACTTCTGAAG<br>CAAGC |                                                                                              |
| CLCN5-off-3-3F  | TCACTGCCAGGTAAG<br>TGTGG | To amplify predicted off-target of sgRNA 3 in the intron of Coro2b gene.                     |
| CLCN5-off-3-3R  | CTTGTCAGCACATG<br>GTGTC  |                                                                                              |
| GFPF            | ACGTAAACGGCCACA<br>AGTTC | To detect GFP DNA.                                                                           |
| GFPR            | AAGTCGTGCTGCTTC<br>ATGG  |                                                                                              |

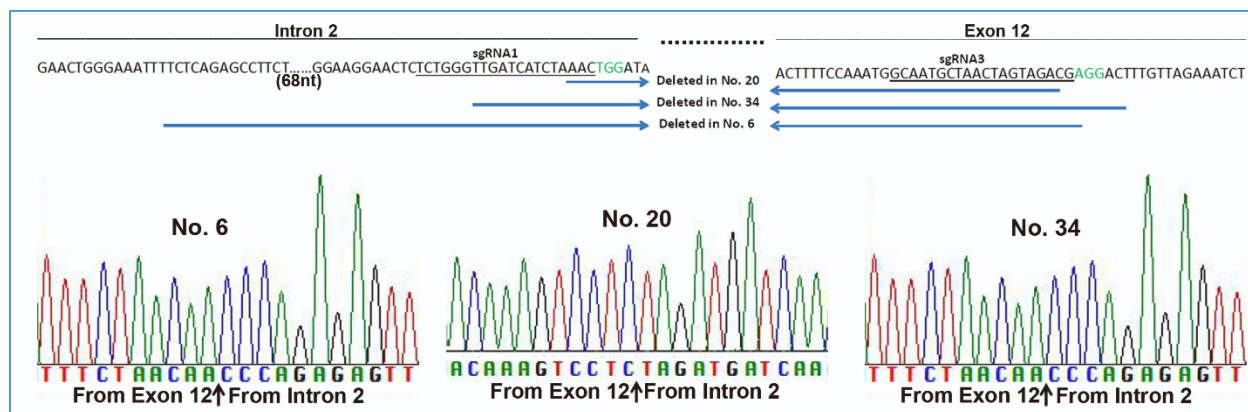

**Figure S1. Confirming *Cln5* gene knockout by DNA sequencing.** Sequences above the horizontal arrows were deleted for the three founder females (No. 6, 20 and 34). The sgRNA target sequences (underlined) in intron 2 and exon 12 are shown. PAMs are in green. A reverse primer matching exon 12 was used for sequencing. The junctions between intron 2 and exon 12 are indicated by a vertical arrow.

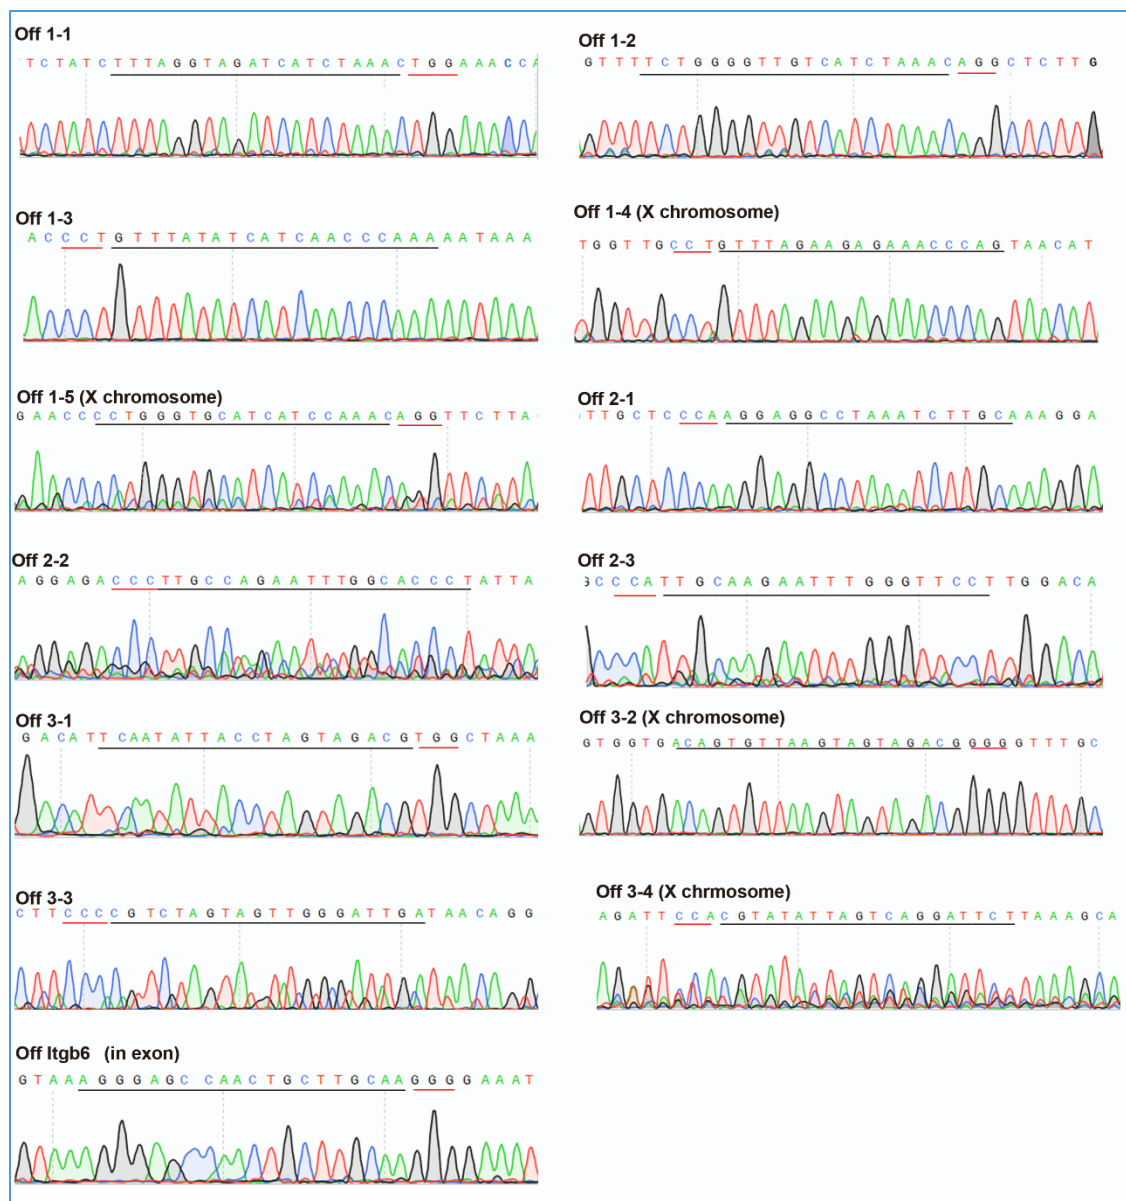

**Figure S2. DNA sequencing analysis of predicted off-targets in *Clcn5* gene knockout mice.** The protospacer adjacent motifs (or the reverse complementary sequences) were underlined with red lines and the target sequences were underlined with black lines. Off 1, Off 2 and Off 3 were off-targets for sgRNA 1, sgRNA 2 and sgRNA 3 respectively. The last image was the only off-target on protein coding gene. The four off-targets on X chromosome were also labeled.

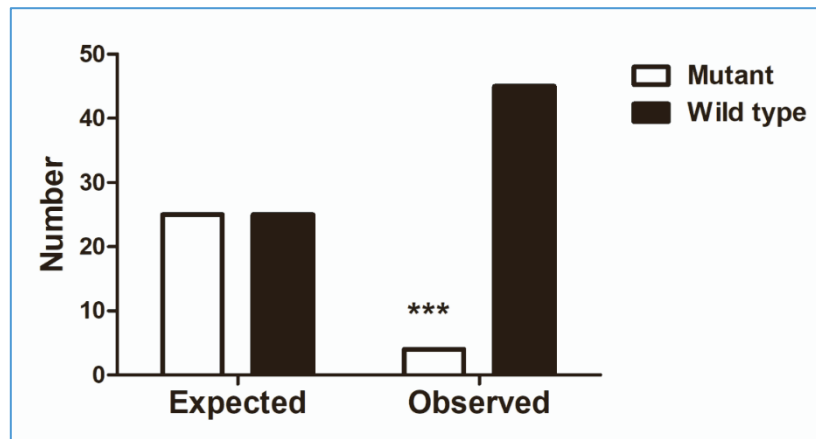

**Figure S3. *Clcn5* mutant males were obtained less than expected. \*\*\* indicates  $p < 0.001$  in Fisher's exact test.**

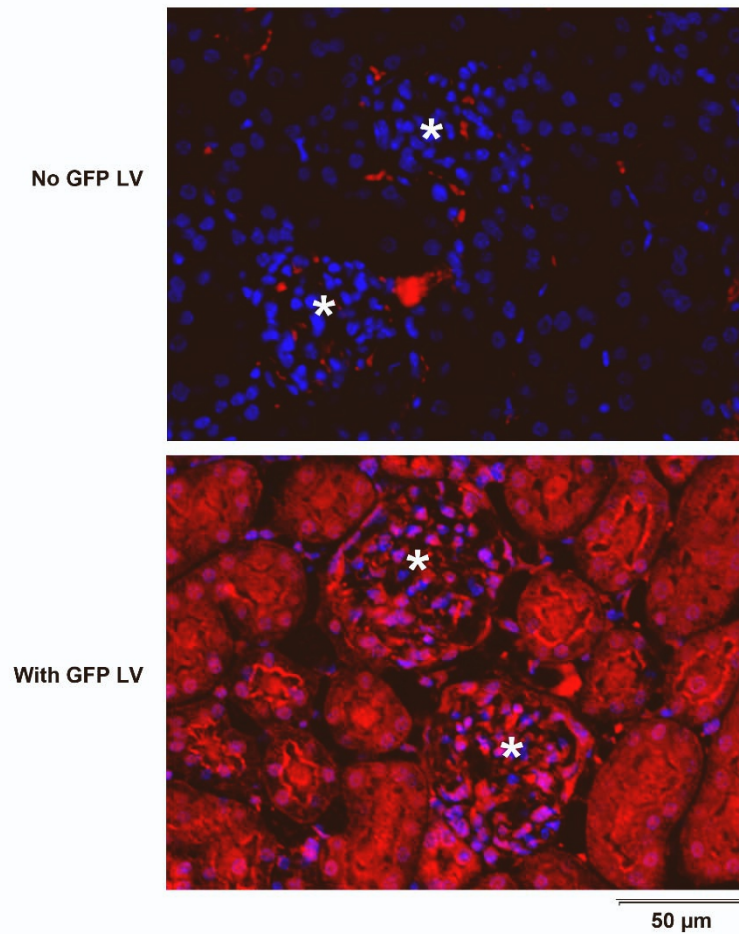

**Figure S4. Observation of GFP expression in the glomeruli.** Top iamge: Failure to observe GFP immunofluorescent signals in the kidney without GFP LV injection. Bottom image: Oberservation of GFP immunofluorescent signals in the tubular structures and the glomeruli of the kindeys with GFP LV injection. The glomeruli were marked by \*.

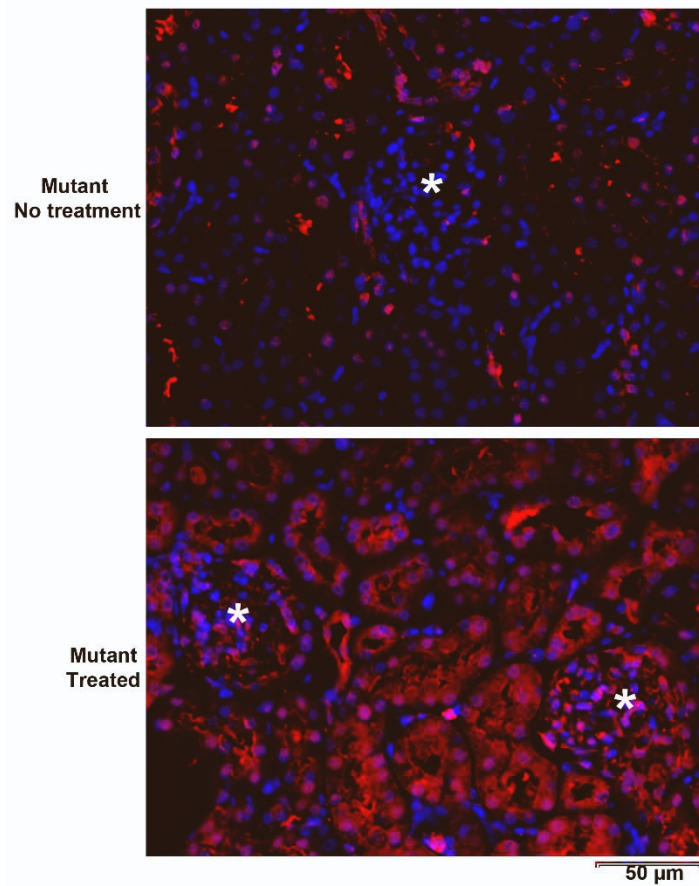

**Figure S5. Observation of CLCN5 expression in the glomeruli of mutant mice.** Top image: Failure to observe CLCN5 immunofluorescent signals in the kidney without CLCN5 LV injection. Bottom image: Observation of CLCN5 immunofluorescent signals in the tubular structures and the glomeruli of the kidneys with CLCN5 LV injection. The glomeruli were marked by \*.



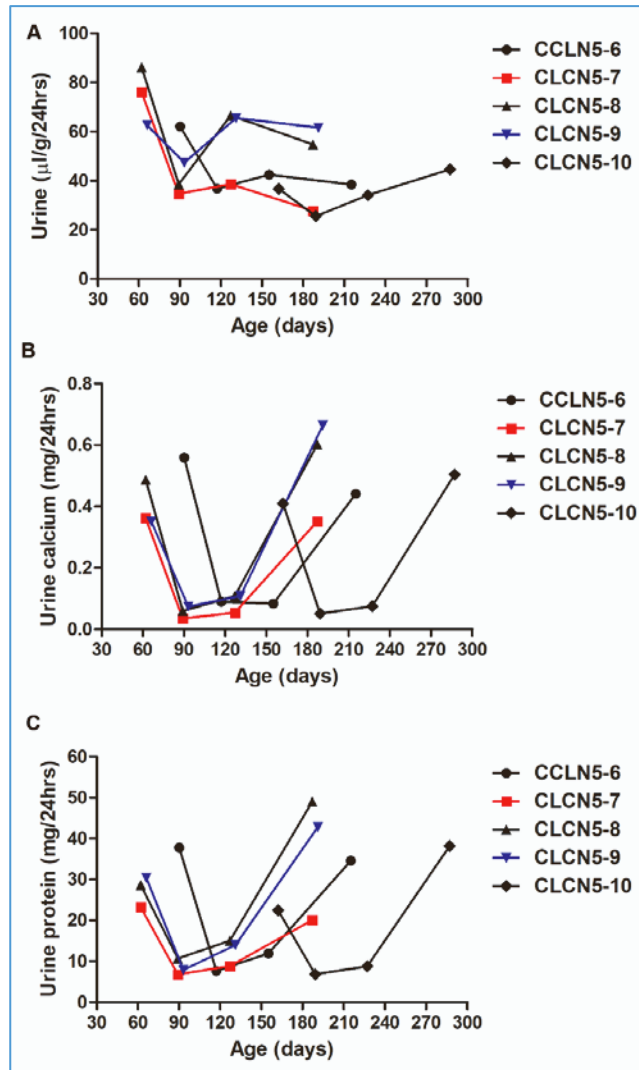

**Figure S6. Effects of delivering CLCN5 LV to the left kidney. A.** Urine volume. **B.** Urine calcium. **C.** Urine protein. CLCN5 LV (280 ng p24) injection was performed on the day of the first datum point for each mouse. The urine was collected 37 days before LV injection. The second, third and fourth data points showed the actual time when the urine samples were collected.

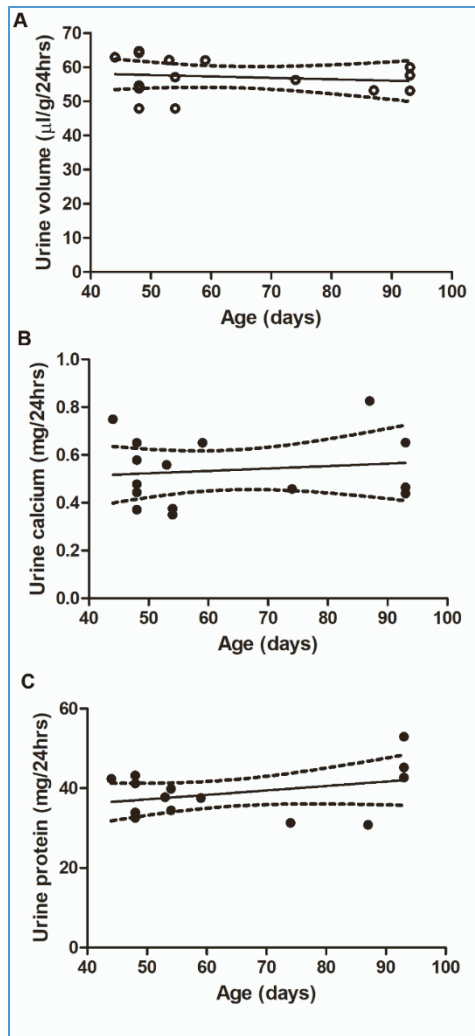

**Figure S7. Age did not greatly affect the urine parameters of mutant mice. A.** Urine volume. **B.** Urine calcium. **C.** Urine protein. Each datum point was from a different male mutant mouse. The dashed lines show the 95% confidence intervals.

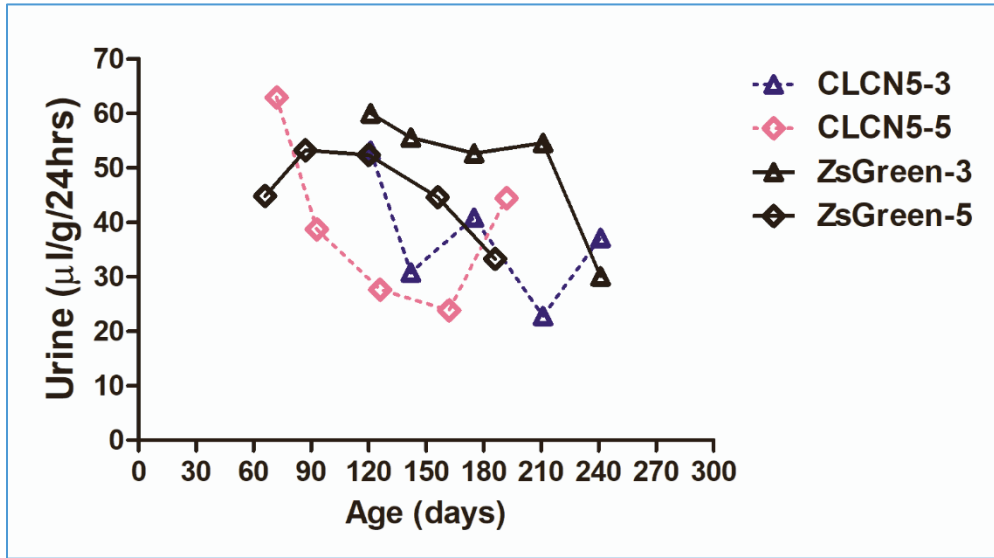

**Figure S8. CLCN5 gene therapy on diuresis.** Two of the 5 age-matched pairs were presented here for visibility. The other three pairs were shown in **Fig.7A**. Both kidneys were treated.

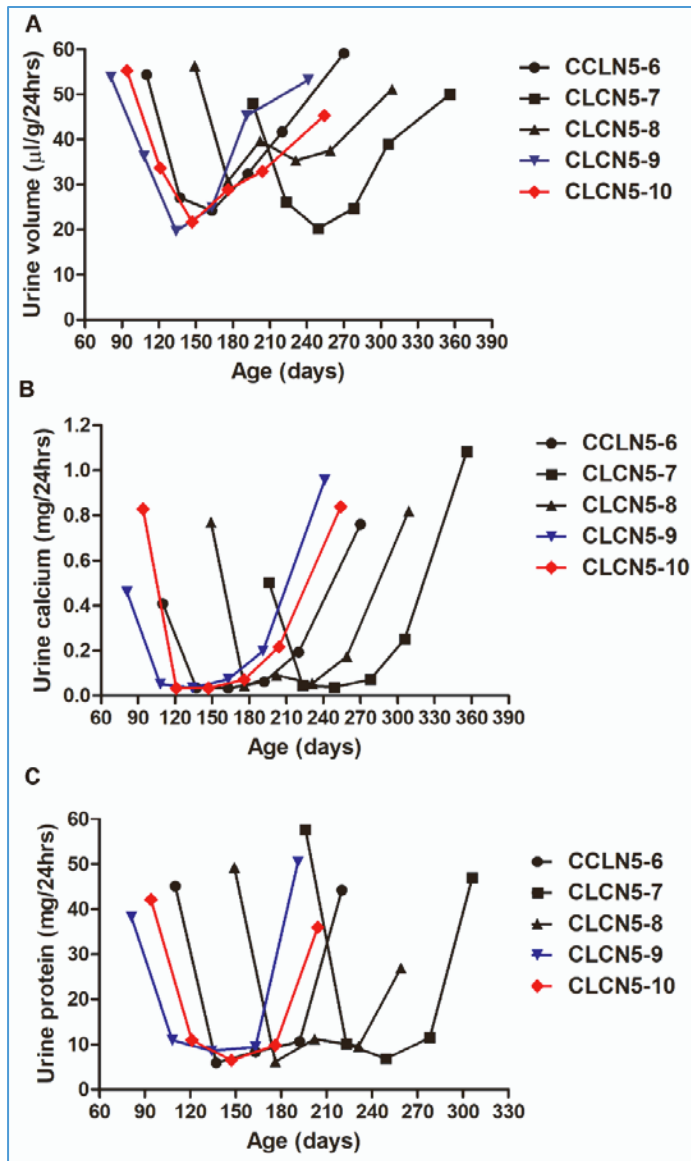

**Figure S9. Effects of delivering CLCN5 LV to both kidneys. A. Urine volume. B. Urine calcium. C. Urine protein.** CLCN5 LV (280 ng p24/kidney) injection was performed on the day of the first datum point for each mouse. The urine was collected 7 days before LV injection. The second, third, fourth and fifth data points showed the actual age when the urine samples were collected.

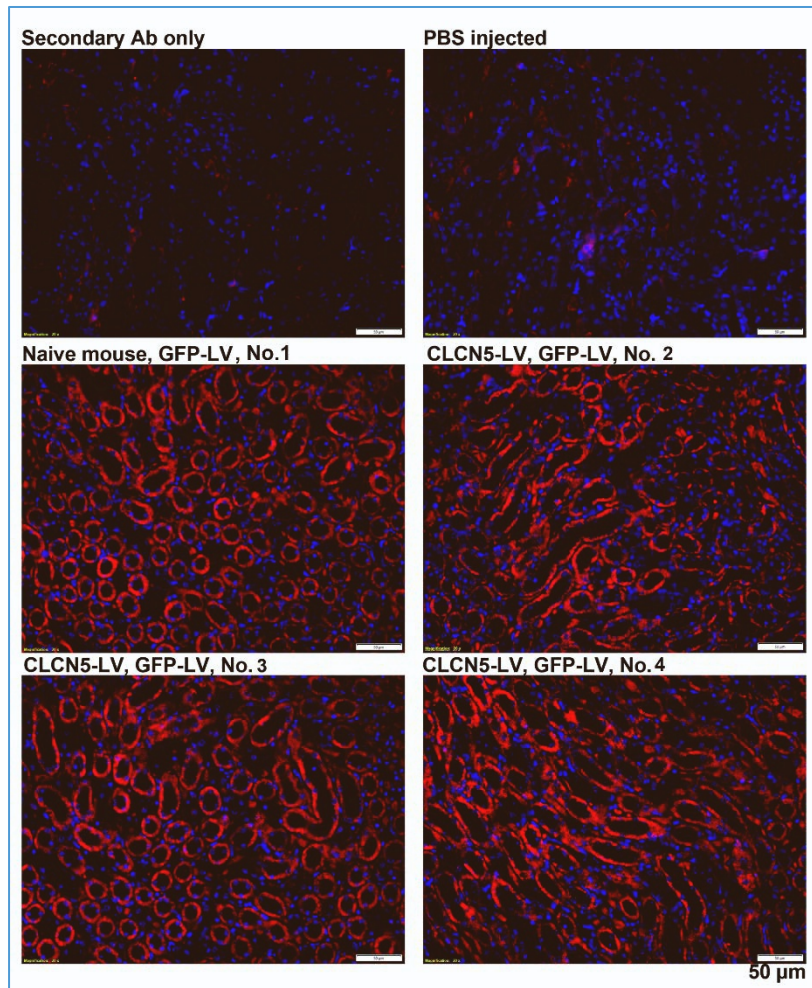

**Figure S10. Detecting GFP protein by immunofluorescence in mouse kidney with and without CLCN5 LV injection.** Naïve mouse was a 6-month wild type mouse receiving GFP LV injection without CLCN5 LV pre-injection. The GFP expression image for this mouse is a re-use of part of the image in Fig.3D (GFP-LV Injection Primary and Secondary Ab) since these images showed the GFP expression in the same mouse. The other three mice (CLCN5-LV, GFP-LV, No.2~4) were mutant mice that received GFP LV injection 10 months following CLCN5 LV injection. The mice were euthanized 2 weeks after GFP LV injection.
